1 **TITLE**

2 NLRC5 regulates expression of MHC-I and provides a target for anti-tumor immunity in  
3 transmissible cancers

4 **RUNNING TITLE**

5 NLRC5 upregulates MHC-I on transmissible tumors

6 **AUTHORS**

7 Chrissie E. B. Ong<sup>1\*</sup>, Amanda L. Patchett<sup>1</sup>, Jocelyn M. Darby<sup>1</sup>, Jinying Chen<sup>1,2</sup>, Guei-Sheung  
8 Liu<sup>1,3</sup>, A. Bruce Lyons<sup>4</sup>, Gregory M. Woods<sup>1</sup>, Andrew S. Flies<sup>1\*</sup>

9 **AFFILIATIONS**

10 <sup>1</sup>Menzies Institute for Medical Research, College of Health and Medicine, University of  
11 Tasmania, Hobart, TAS, Australia

12 <sup>2</sup>Department of Ophthalmology, the First Affiliated Hospital of Jinan University, Guangzhou,  
13 China

14 <sup>3</sup>Ophthalmology, Department of Surgery, University of Melbourne, East Melbourne,  
15 Australia

16 <sup>4</sup>Tasmanian School of Medicine, College of Health and Medicine, University of Tasmania,  
17 Hobart, TAS, Australia

18 **CORRESPONDING AUTHORS CONTACT INFORMATION**

19 **Andrew S. Flies, PhD**

20 Menzies Institute for Medical Research, College of Health and Medicine

21 University of Tasmania

22 Private Bag 23, Hobart TAS 7000

23 phone: +61 3 6226 4614; email: [Andy.Flies@utas.edu.au](mailto:Andy.Flies@utas.edu.au)

24 **Chrissie E. B. Ong, PhD candidate**

25 Menzies Institute for Medical Research, College of Health and Medicine

26 University of Tasmania

27 Private Bag 23, Hobart TAS 7000

28 email: [Chrissie.Ong@utas.edu.au](mailto:Chrissie.Ong@utas.edu.au)

29 **KEYWORDS**

30 transmissible cancer, devil facial tumor, allograft, MHC-I, NLRC5, contagious cancer,

31 immune evasion, wild immunology

32 **ABSTRACT**

33 Downregulation of major histocompatibility complex I (MHC-I) on tumor cells is a primary  
34 means of immune evasion by many types of cancer. Additionally, MHC-I proteins are a  
35 primary target of immune-mediated transplant rejection. Transmissible tumors that overcome  
36 allograft rejection mechanisms and evade anti-tumor immunity have killed thousands of wild  
37 Tasmanian devils (*Sarcophilus harrisii*). Interferon gamma (IFNG) upregulates surface MHC-  
38 I expression on devil facial tumor (DFT) cells but is not sufficient to induce tumor regressions.  
39 Transcriptome analysis of IFNG-treated DFT cells revealed strong upregulation of *NLRC5*, a  
40 master regulator of MHC-I in humans and mice. To explore the role of *NLRC5* in transmissible  
41 cancers, we developed DFT cell lines that constitutively overexpress *NLRC5*. Transcriptomic  
42 results suggest that the role of *NLRC5* as a master regulator of MHC-I is conserved in devils.  
43 Furthermore, *NLRC5* was shown to drive the expression of many components of the antigen  
44 presentation pathway. To determine if MHC-I is a target of allogeneic immune responses, we  
45 tested serum from devils with anti-DFT responses including natural DFT regressions against  
46 DFT cells. Antibody binding occurred with cells treated with IFNG and overexpressed *NLRC5*.  
47 However, CRISPR/Cas9-mediated knockout of MHC-I subunit beta-2-microglobulin (*B2M*)  
48 eliminated antibody binding to DFT cells. Consequently, MHC-I could be identified as a target  
49 for anti-tumor and allogeneic immunity and provides mechanistic insight into MHC-I  
50 expression and antigen presentation in marsupials. *NLRC5* could be a promising target for  
51 immunotherapy and vaccines to protect devils from transmissible cancers and inform  
52 development of transplant and cancer therapies for humans.

## 53 INTRODUCTION

54 In 1996, a wild Tasmanian devil (*Sarcophilus harrisii*) was photographed with a large facial  
55 tumor. In subsequent years, similar devil facial tumors (DFTs) were recorded<sup>1</sup>, and in 2006, it  
56 was confirmed that DFTs are clonally transmissible cancers that spread among devils through  
57 social interactions<sup>2,3</sup>. In 2014, a second genetically independent transmissible devil facial tumor  
58 (DFT2) was discovered in southern Tasmania<sup>4</sup>. Despite the independent origin of the first devil  
59 facial tumor (DFT1) and DFT2, both clonal tumors arose from a Schwann cell lineage<sup>5,6</sup>,  
60 suggesting devils could be prone to transmissible Schwann cell cancers. These lethal and  
61 unique tumors are simultaneously cancers, allografts, and infectious diseases, and have been  
62 the primary driver of an average 77% decline in devil populations across the island state of  
63 Tasmania<sup>7</sup>.

64

65 The successful transmission and seeding of DFT cells from one devil to another as an allograft<sup>3</sup>  
66 reveals its ability to circumvent both allogeneic and anti-tumor immune responses. DFT1 cells  
67 generally express little or no major histocompatibility complex class I (MHC-I) on their  
68 surface<sup>8</sup>, an immune escape mechanism commonly observed in human cancers<sup>9</sup> that prevents  
69 recognition of tumor cells by cytotoxic anti-tumor CD8<sup>+</sup> T cells. Beta-2-microglobulin (B2M)  
70 is necessary for surface MHC-I expression and the clonal DFT1 cell lineage has a hemizygous  
71 mutation in the *B2M* gene<sup>10</sup>, suggesting that immune evasion through reduced MHC-I  
72 expression has been a target of evolutionary selection pressure. Loss of MHC-I should lead to  
73 recognition and cytotoxic responses by natural killer (NK) cells. Devils have demonstrated  
74 NK-like activity *in vitro*<sup>11</sup> but the ongoing transmission of DFT1 cells suggests that NK  
75 cytotoxic response against DFT1 cells either do not occur or are ineffective. All DFT1 cell  
76 lines tested to date can upregulate MHC-I in response to interferon gamma (IFNG) treatment<sup>8</sup>.  
77 Rare cases of DFT1 regression have been reported in the wild<sup>12</sup> and serum antibody responses  
78 of these devils are generally higher against cell lines treated with IFNG to upregulate MHC-  
79 I<sup>12,13</sup>. In contrast to DFT1 cells, DFT2 cells constitutively express MHC-I, but the most highly-  
80 expressed alleles appear to be those shared by the DFT2 cells and the host devil<sup>14</sup>. This further  
81 suggest a critical role of MHC-I in immune evasion by DFT cells.

82

83 Upregulation of MHC-I on DFT1 cells via treatment with IFNG has served as the foundation  
84 for a vaccine against devil facial tumor disease (DFTD), which is caused by DFT1 cells.  
85 However, there are caveats to using a pleiotropic cytokine such as IFNG. IFNG plays multiple  
86 roles in the innate and adaptive immune system and can function to drive either an anti-tumor

87 or a pro-tumor response depending on the circumstances<sup>15</sup>. While IFNG is well known for  
88 directing the immune response towards anti-tumor immunity, it also causes the upregulation of  
89 programmed death ligand 1 (PDL1)<sup>16</sup> and non-classical, monomorphic MHC-I SAHA-UK on  
90 DFT cells<sup>14</sup>. PDL1 and SAHA-UK molecules can be counterproductive to the cell-mediated  
91 immune response mediated by MHC-I recognition. Additionally, the inhibition of cell  
92 proliferation and increased DFT cell death associated with IFNG<sup>17</sup> constrain large-scale  
93 production of IFNG-treated DFT cells for whole cell vaccines.

94

95 NLRC5 (NLR caspase recruitment domain containing protein 5), a member of the NOD-like  
96 receptor (NLR) family, was identified in 2010 as the transcriptional activator of MHC-I  
97 genes<sup>18</sup>. NLRC5 is strongly upregulated by IFNG and is found to be a critical mediator for  
98 IFNG-induced MHC-I expression in humans and mice<sup>18</sup>, but little is known about NLRC5 in  
99 other species. NLRC5 acts with high specificity<sup>18</sup>, and functions in MHC-I regulation by  
100 interacting with several other transcription factors<sup>19</sup> to form a multi-protein complex called the  
101 enhanceosome<sup>20,21</sup>. The enhanceosome activates the promoters of MHC-I genes and  
102 components of the antigen processing machinery such as B2M, immunoproteasome subunits  
103 PSMB8 (also known as LMP7) and PSMB9 (also known as LMP2), and transporter associated  
104 with antigen processing 1 (TAP1)<sup>9,18</sup>. Aside from MHC-I regulation, NLRC5 has been reported  
105 to be involved in innate immune responses as well as malignancy of certain cancers<sup>22</sup>. Despite  
106 a potential central role of NLRC5 in immune evasion, studies of NLRC5 remain limited and  
107 several hypothesized secondary roles of NLRC5 remain unexplored<sup>22</sup>.

108

109 In this study, we take advantage of a unique natural experiment in which two independent  
110 clonal tumor cell lines have essentially been passaged through hundreds of free-living animals  
111 to assess the role of NLRC5 and MHC-I in immune evasion. The overexpression of NLRC5 in  
112 DFT1 and DFT2 cells induced the expression of *B2M*, MHC-I heavy chain *SAHA1-01* and other  
113 functionally-related genes. *PDL1* and the non-classical MHC-I *SAHA-UK* which are  
114 upregulated by IFNG were not induced by NLRC5. MHC-I was constitutively expressed on  
115 the surface of DFT cells overexpressing NLRC5, which suggests that modulation of NLRC5  
116 expression could be a potential substitute for IFNG to increase DFT cell immunogenicity.  
117 Additionally, MHC-I molecules on DFT cells were revealed to be an immunogenic target of  
118 allogeneic responses in wild devils.

## 119 MATERIALS AND METHODS

### 120 Cells and Cell Culture Conditions

121 DFT1 cell line C5065 strain 3<sup>23</sup> (RRID:CVCL\_LB79) and DFT2 cell lines RV  
122 (RRID:CVCL\_LB80) and JV (RRID not available) were used in this study as indicated. DFT1  
123 C5065 was provided by A-M Pearse and K. Swift of the Department of Primary Industries,  
124 Parks, Water and Environment (DPIPWE) (Hobart, TAS, Australia) and was previously  
125 established from DFT1 biopsies obtained under the approval of the Animal Ethics Committee  
126 of the Tasmanian Parks and Wildlife Service (permit numbers 33/2004-5 and 32/2005-6).  
127 DFT2 cell lines RV and JV were established from single cell suspensions obtained from tumor  
128 biopsies<sup>4</sup>. Cells were cultured at 35 °C with 5% CO<sub>2</sub> in complete RPMI medium: RPMI 1640  
129 medium with L-glutamine (Thermo Fisher Scientific, Waltham, MA, USA), 10% heat-  
130 inactivated fetal bovine serum (Bovogen Biologicals, Melbourne, VIC, Australia), 1% (v/v)  
131 Antibiotic-Antimycotic (100X) (Thermo Fisher Scientific), 10 mM HEPES (Thermo Fisher  
132 Scientific) and 50 µM 2-mercaptoethanol (Sigma-Aldrich, St. Louis, MO, USA).

133

### 134 RNA Sequencing and Analysis

135 Initial RNA sequencing was performed using DFT1 C5065 and DFT2 RV cells treated with  
136 and without 5 ng/mL recombinant devil IFNG (provided by Walter and Eliza Hall Institute  
137 (WEHI), Melbourne, VIC, Australia) for 24 h according to the previously described  
138 protocols<sup>6,24</sup>. For the remaining cell lines (**Table 1**, ID # 5–9), total RNA was extracted using  
139 the NucleoSpin<sup>®</sup> RNA plus kit (Macherey Nagel, Düren, Germany) per manufacturer's  
140 instructions. Two replicates were prepared for each cell line. RNA sequencing was conducted  
141 at the Ramaciotti Centre for Genomics (Sydney, NSW, Australia) using the following methods.  
142 RNA integrity was assessed using Agilent TapeStation (Agilent Technologies, Santa Clara, CA,  
143 USA). All samples had RNA Integrity Number (RIN) scores of 10.0. mRNA libraries were  
144 prepared using the TruSeq Stranded mRNA Library Prep (Illumina Inc., San Diego, CA, USA).  
145 The libraries were sequenced on an Illumina NovaSeq 6000 platform (Illumina) with 100 base-  
146 pair single-end reads. The quality of the sequencing reads were analyzed using FastQC version  
147 0.11.9<sup>25</sup>. Raw FASTQ files have been deposited to the European Nucleotide Archive (ENA)  
148 and are available at BioProject # PRJEB39847.

149

150 The sequencing reads were mapped to the Tasmanian devil reference genome  
151 (GCA\_902635505.1 mSarHar1.11) using Subread version 2.0.0<sup>26</sup>. Uniquely mapped reads

152 were counted and assigned to genes using featureCounts<sup>27</sup>. Differential expression analysis of  
153 gene counts was performed using statistical software R studio<sup>28</sup> on R version 4.0.0<sup>29</sup>. Firstly,  
154 genes with less than 100 aligned reads across all samples were filtered out to exclude lowly  
155 expressed genes. Gene counts were then normalized across samples by upper quartile  
156 normalization using edgeR<sup>30-32</sup> and EDASeq<sup>33,34</sup>. Normalized read counts were scaled by  
157 transcripts per kilobase million (TPM) to account for varied gene lengths. For differential  
158 expression analysis, gene expression of NLRC5-overexpressing cell lines (DFT1.NLRC5,  
159 DFT2.NLRC5) were compared against BFP-control cell lines (DFT1.BFP, DFT2.BFP) while  
160 IFNG-treated cells (DFT1.WT + IFNG, DFT2.WT<sup>RV</sup> + IFNG) were compared against the  
161 untreated wild-type (DFT1.WT, DFT2.WT<sup>RV</sup>), according to their respective tumor origin.  
162 Differential gene expression was calculated using the *voom*<sup>35</sup> function in *limma*<sup>36</sup> with linear  
163 modelling and empirical Bayes moderation<sup>37</sup> (**Supplementary Table 1**). Genes were defined  
164 as significantly differentially expressed by applying FDR < 0.05, and log<sub>2</sub> fold change (FC) ≥  
165 2.0 (upregulated) or ≤ -2.0 (downregulated) thresholds.

166

167 A bar plot of fold change in mRNA expression upon treatment was created from TPM values  
168 in GraphPad Prism version 5.03. Venn diagrams of differentially expressed genes were  
169 developed using Venny version 2.1<sup>38</sup>. Heatmaps were created from log<sub>2</sub>TPM values using the  
170 ComplexHeatmap<sup>39</sup> package in R studio. For functional enrichment analysis, over-  
171 representation of gene ontology (GO) and Reactome pathways was analyzed on differentially  
172 expressed genes in R studio using functions *enrichGO* in ClusterProfiler<sup>40</sup> and *enrichPathway*  
173 in ReactomePA<sup>41</sup>, respectively. Significant GO terms and Reactome pathways were selected  
174 by applying the cut-offs p-value < 0.001, q-value < 0.05 and adjusted p-value < 0.05. P-values  
175 were adjusted for multiple testing using Benjamini–Hochberg method.

176

## 177 **Plasmid Construction**

178 The coding sequence for full length devil *NLRC5* (ENSSHAT00000015489.1) was isolated  
179 from cDNA of devil lymph node mononuclear cells stimulated with recombinant devil IFNG<sup>16</sup>  
180 (10 ng/mL, 24 h). Devil *NLRC5* was then cloned into plasmid pAF105 (detailed description of  
181 pAF105 plasmid construction available in **Supplementary Methods 1**). For this study, devil  
182 *NLRC5* was amplified from pAF105 with overlapping ends to the 5' and 3' SfiI sites of the  
183 Sleeping Beauty transposon plasmid pSBbi-BH<sup>42</sup> (a gift from Eric Kowarz; Addgene # 60515,  
184 Cambridge, MA, USA) using Q5<sup>®</sup> Hotstart High-Fidelity 2X Master Mix (New England  
185 Biolabs (NEB), Ipswich, MA, USA) (see **Supplementary Table 2** for primers and reaction



186 conditions). The fragment was cloned into SfiI-digested (NEB) pSBbi-BH using NEBuilder®  
187 HiFi DNA Assembly Cloning Kit (NEB) and the assembled plasmid pCO1 was transformed  
188 into NEB® 5-alpha competent *Escherichia coli* (High Efficiency) (NEB) according to  
189 manufacturer's instructions (see **Supplementary Figure 1** for plasmid maps). Positive clones  
190 were identified by colony PCR and the plasmid was purified using NucleoSpin® Plasmid  
191 EasyPure kit (Macherey-Nagel). The cloned devil *NLRC5* transcript was verified by Sanger  
192 sequencing using Big Dye™ Terminator v3.1 Cycle Sequencing Kit (Applied Biosystems  
193 (ABI), Foster City, CA, USA) and Agencourt® CleanSEQ® (Beckman Coulter, Brea, CA, USA)  
194 per manufacturer's instructions. The sequences were analyzed on 3500xL Genetic Analyzer  
195 (ABI) (see **Supplementary Table 3** for list of sequencing primers). For detailed step-by-step  
196 protocols for plasmid design and construction, reagent recipes, and generation of stable cell  
197 lines, see Bio-protocol # e3986<sup>43</sup>.

198

### 199 **Transfection and Generation of Stable Cell Lines**

200 Stable cell lines of both DFT1 and DFT2 (C5065 and JV cell lines respectively) overexpressing  
201 *NLRC5* were prepared as follows.  $5 \times 10^5$  cells were seeded into a 6-well plate and incubated  
202 overnight to achieve 50–80% confluency on the day of transfection. As the vector constructed  
203 uses a Sleeping Beauty (SB) transposon system for gene transfer, co-transfection of an  
204 expression vector encoding a SB transposase enzyme pCMV(CAT)T7-SB100<sup>44</sup> (a gift from  
205 Zsuzsanna Izsvak; Addgene plasmid # 34879) was needed to facilitate this process. Per 2.0 mL  
206 of culture volume, 2.0 µg of plasmid DNA (1.5 µg pCO1 + 0.5 µg pCMV(CAT)T7-SB100)  
207 was diluted in phosphate-buffered saline (PBS) to 100 µL and then added to 6.0 µg of  
208 polyethylenimine (PEI) (1 mg/mL, linear, 25 kDa; Polysciences, Warrington, FL, USA) diluted  
209 in PBS to 100 µL (3:1 ratio of PEI to DNA (w/w)). The DNA:PEI solution was mixed by gentle  
210 pipetting and incubated at room temperature for 15 to 20 min. The media on DFT cells were  
211 replaced with fresh complete RPMI medium and the transfection mix was added dropwise to  
212 the cells. The cells were incubated with the DNA:PEI solution overnight at 35 °C with 5% CO<sub>2</sub>.  
213 The next morning, media was replaced with fresh complete RPMI medium. 48 h post-  
214 transfection, the cells were observed for fluorescence through expression of reporter gene  
215 mTagBFP and were subjected to seven days of positive selection by adding 1 mg/mL  
216 hygromycin B (Sigma-Aldrich) in complete RPMI medium. Once selection was complete, the  
217 cells were maintained in 200 µg/mL hygromycin B in complete RPMI medium. pSBbi-BH was  
218 used as a control to account for the effects of the transfection and drug selection process.

219

## 220 **Flow Cytometric Analysis of B2M Expression**

221 Cells were harvested and plated in a round-bottom 96-well plate ( $1 \times 10^5$  per well) and  
222 centrifuged at 500g for 3 min at 4 °C to discard the medium. Cells were blocked with 50  $\mu$ L of  
223 1% normal goat serum (Thermo Fisher Scientific) in FACS buffer (PBS with 0.5% BSA, 0.02%  
224 sodium azide) for 10 min on ice. After blocking, 0.4  $\mu$ L anti-devil B2M mouse antibody in  
225 supernatant (13-34-45, a gift from Hannah Siddle)<sup>8</sup> diluted to a total of 50  $\mu$ L in FACS buffer  
226 was added to the cells for 15 min on ice. The cells were washed with 150  $\mu$ L FACS buffer and  
227 centrifuged at 500g for 3 min at 4 °C. Goat anti-mouse IgG-Alexa Fluor 488 (Thermo Fisher  
228 Scientific) was diluted in FACS buffer to 4  $\mu$ g/mL and 50  $\mu$ L of the solution was incubated  
229 with the target cells in the dark for 30 min on ice. The cells were washed twice with FACS  
230 buffer to remove excess secondary antibody. Lastly, the cells were resuspended in 200  $\mu$ L  
231 FACS buffer with propidium iodide (PI) (500 ng/mL) (Sigma-Aldrich) prior to analysis on BD  
232 FACSCanto™ II (BD Biosciences, Franklin Lakes, NJ, USA). As a positive control for surface  
233 B2M expression, DFT1 C5065 and DFT2 JV cells were stimulated with 5 ng/mL recombinant  
234 devil IFNG<sup>16</sup> for 24 h.

235

## 236 **Generation of *B2M* CRISPR/Cas9 Knockout Cell Lines (*B2M*<sup>-/-</sup>)**

237 Two single guide RNAs (sgRNAs) targeting the first exon of devil *B2M* gene  
238 (ENSSHAG00000017005) were designed using a web-based CRISPR design tool  
239 CHOPCHOP<sup>45</sup> (**Supplementary Figure 2**). Complementary oligonucleotides encoding each  
240 *B2M* sgRNA sequence were synthesized (Integrated DNA Technologies (IDT), Coralville, IA,  
241 USA), phosphorylated and annealed before cloning into lentiCRISPRv2 plasmid<sup>46</sup> (a gift from  
242 Feng Zhang; Addgene # 52961) at BsmBI (NEB) restriction sites using T4 DNA ligase (NEB)  
243 (see **Supplementary Table 4** for oligonucleotide sequences). The ligated plasmids pAF217  
244 and pAF218 were then transformed into NEB® Stable Competent *Escherichia coli* (High  
245 Efficiency) (NEB). Single colonies were selected, and the plasmids were purified using  
246 ZymoPURE™ Plasmid Miniprep Kit (Zymo Research, Irvine, CA, USA). The sgRNA  
247 sequence in each plasmid was validated by Sanger sequencing according to the method  
248 described above (see **Supplementary Table 3** for list of sequencing primers).

249

250 *B2M* targeting vectors pAF217 and pAF218 were each transfected into DFT1.WT and  
251 DFT1.NLRC5 cells to generate *B2M* knockout cell lines DFT1.*B2M*<sup>-/-</sup> and



252 DFT1.NLRC5.B2M<sup>-/-</sup>. Transfection of cells were carried out as described above with the  
253 exception that 1.5 µg of plasmid was used instead of 2.0 µg. A day after transfection, the cells  
254 were subjected to positive selection by adding 100 µg/mL puromycin (InvivoGen, San Diego,  
255 CA, USA) for a week.

256

257 Post-drug selection, the cells were screened and sorted multiple rounds using a Beckman-  
258 Coulter MoFlo Astrios cell sorter to select DFT1.B2M<sup>-/-</sup> and DFT1.NLRC5.B2M<sup>-/-</sup> cells with  
259 negative B2M expression. DFT1.B2M<sup>-/-</sup> cells were treated with 10 ng/mL devil recombinant  
260 IFNG<sup>16</sup> for 24 h to stimulate surface B2M upregulation prior to analysis. For flow cytometry,  
261 cells were first harvested by centrifugation at 500g for 3 min at 4 °C, and then blocked with  
262 100 µL of 1% normal goat serum (Thermo Fisher Scientific) in complete RPMI medium for  
263 10 min on ice. After blocking, the cells were incubated with 0.8 µL anti-devil B2M mouse  
264 antibody in supernatant<sup>8</sup> diluted in complete RPMI to a total of 100 µL for 15 min on ice. The  
265 cells were washed with 2.0 mL complete RPMI and centrifuged at 500g for 3 min at 4 °C. Next,  
266 the cells were incubated with 100 µL of 2 µg/mL goat anti-mouse IgG-Alexa Fluor 647  
267 (Thermo Fisher Scientific) diluted in complete RPMI in the dark for 15 min on ice. The cells  
268 were washed with 2.0 mL of complete RPMI medium to remove excess secondary antibody.  
269 Lastly, the cells were resuspended to a concentration of 1×10<sup>7</sup> cells/ml in 200 ng/mL DAPI  
270 (Sigma-Aldrich) diluted in complete RPMI medium. B2M negative cells were selected and  
271 bulk-sorted using cell sorter Moflo Astrios EQ (Beckman Coulter).

272

273 After multiple rounds of sorting to establish a B2M negative population, genomic DNA of the  
274 cells was isolated and screened for mutations in the *B2M* gene by Sanger sequencing (see  
275 **Supplementary Table 3** for sequencing primers). Indels (insertions or deletions) in the *B2M*  
276 gene were assessed using Inference of CRISPR Edits (ICE) analysis tool version 2.0 from  
277 Synthego<sup>47</sup> (Menlo Park, CA, USA) (**Supplementary Figure 2**). *B2M* knockout cell lines: (i)  
278 DFT1.B2M<sup>-/-</sup> derived from DFT1 cells transfected with pAF217, and (ii) DFT1.NLRC5.B2M<sup>-/-</sup>  
279 <sup>-/-</sup> derived from DFT1.NLRC5 transfected with pAF218 were selected for downstream analysis  
280 (see **Table 1** for full list of cell lines).

281

## 282 **Flow Cytometric Analysis of Serum Antibody Target**

283 Serum samples from wild Tasmanian devils were collected as described<sup>12,48</sup>. To induce surface  
284 expression of MHC-I, DFT cells were treated with 10 ng/mL devil recombinant IFNG<sup>16</sup> for 24

285 h prior to analysis. Cells were washed with cold FACS buffer and  $1 \times 10^5$  cells per well were  
286 plated in a round-bottom 96-well plate. The cells were centrifuged at 500g for 3 min at 4 °C to  
287 discard the medium. Serum samples (see **Supplementary Table 5** for serum sample  
288 information) were thawed on ice and diluted 1:50 with FACS buffer. 50  $\mu$ L of diluted serum  
289 was added to the cells and incubated for 1 h on ice. After incubation, the cells were washed  
290 twice with 200  $\mu$ L FACS buffer. 50  $\mu$ L of 10  $\mu$ g/mL monoclonal mouse anti-devil IgG2b  
291 antibody (A4-D1-2-1, provided by WEHI)<sup>49</sup> in FACS buffer was added to the cells and  
292 incubated for 30 min on ice. The cells were washed twice with FACS buffer and then incubated  
293 with 50  $\mu$ L of 4  $\mu$ g/ml goat anti-mouse IgG-Alexa Fluor 488 (Thermo Fisher Scientific) in  
294 FACS buffer for 30 min on ice, protected from light. The cells were washed twice with ice-  
295 cold PBS (Thermo Fisher Scientific). After washing, the cells were stained with  
296 LIVE/DEAD<sup>TM</sup> Fixable Near-IR Dead Cell Stain (Thermo Fisher Scientific) per  
297 manufacturer's instructions. For B2M surface expression analysis, the cells were stained as  
298 described in the protocol above. However, LIVE/DEAD<sup>TM</sup> Fixable Near-IR Dead Cell Stain  
299 (Thermo Fisher Scientific) was used instead of PI to determine cell viability. All cells were  
300 fixed with FACS fix (0.02% sodium azide, 1.0% glucose, 0.4% formaldehyde) diluted by 20  
301 times prior to analysis on BD FACSCanto<sup>TM</sup> II (BD Biosciences).

302

## 303 **RESULTS**

### 304 **NLRC5 is upregulated in DFT1 and DFT2 cells treated with IFNG**

305 IFNG has been shown to upregulate MHC-I<sup>8</sup> and PDL1<sup>16</sup> on DFT cells. To probe the  
306 mechanisms driving upregulation of these key immune proteins, we performed RNA-seq using  
307 mRNA extracted from IFNG-treated DFT1 cell line C5065 (DFT1.WT) and an IFNG-treated  
308 DFT2 cell line RV (DFT2.WT<sup>RV</sup>). Markers for Schwann cell differentiation, SRY-box 10  
309 (SOX10) and neuroepithelial marker nestin (NES), that are expressed in both DFT1 and DFT2  
310 cells<sup>6</sup>, were selected as internal gene controls. As expected, transcriptome analysis showed that  
311 *B2M*, MHC-I gene *SAHAI-01*, and *PDL1* were strongly upregulated by IFNG. MHC-I  
312 transactivator *NLRC5* was also upregulated upon IFNG treatment, more than a 100-fold in  
313 DFT1.WT (275-fold) and DFT2.WT<sup>RV</sup> cells (124-fold) relative to untreated cells (**Fig. 1**).

314

### 315 **NLRC5 upregulates MHC-I and antigen presentation genes but not PDL1 and non- 316 classical MHC-I**

317 To assess the role of NLRC5 in antigen processing and presentation, we developed an  
318 expression vector that stably upregulates NLRC5 in DFT cells. DFT1 cell line C5065 and  
319 DFT2 cell line JV were used for production of NLRC5-overexpressing DFT cells. Following  
320 drug selection to create stable cell lines, we performed RNA-seq on DFT1 and DFT2 cells  
321 stably transfected with BFP-control and NLRC5 vectors (see **Table 1** for list of cell lines).  
322 Changes in the mRNA expression profile of DFT cells overexpressing NLRC5 relative to BFP-  
323 control cells were examined in parallel with changes observed in wild-type DFT cells following  
324 IFNG treatment (**Fig. 2** and **Supplementary Fig. 3**). The transcriptome for IFNG-treated DFT2  
325 cells was previously generated from the DFT2 RV cell line (DFT2.WT<sup>RV</sup>)<sup>6</sup>. Otherwise, all  
326 DFT2 results are from DFT2 JV.

327  
328 Differential expression analysis showed that 159 genes were upregulated by IFNG (DFT1.WT  
329 + IFNG) in contrast to 40 genes by NLRC5 (DFT1.NLRC5) in DFT1 cells (**Fig. 2**). In DFT2  
330 cells, 288 genes were upregulated by IFNG (DFT2.WT<sup>RV</sup> + IFNG) and 30 genes by NLRC5  
331 (DFT2.NLRC5) (**Fig. 2**). There were ten genes that were upregulated by both IFNG and  
332 NLRC5 in DFT1 and DFT2 cells. These shared genes were predominantly related to MHC-I  
333 antigen processing and presentation pathway which suggests a role of NLRC5 in IFNG-  
334 induced MHC-I expression.

335  
336 A heatmap was used to explore the expression profiles of genes associated with MHC-I and  
337 MHC-II antigen processing and presentation. SOX10 and NES, which are Schwann cell  
338 differentiation markers highly expressed in DFT1 and DFT2 cells<sup>6</sup>, and the myelin protein  
339 periaxin (PRX), a marker for DFT1 cells<sup>50</sup>, were included as internal controls. Overall, NLRC5  
340 upregulated genes involved in MHC-I antigen presentation to a smaller magnitude than IFNG  
341 (**Fig. 3**). NLRC5 upregulated a subset of IFNG-induced MHC-I genes *SAHAI-01*, *SAHAI*  
342 (*LOC105750614*) and *SAHAI* (*LOC100927947*), and genes of the antigen processing  
343 machinery including *B2M*, *PSMB8*, *PSMB9*, and *TAP1*. In comparison, other IFNG-induced  
344 genes such as *PSMB10*, *TAP2* and TAP binding protein (*TAPBP*) were not upregulated by  
345 NLRC5 in either DFT1.NLRC5 or DFT2.NLRC5 cells. MHC-I genes that were induced by  
346 IFNG but not NLRC5 include non-classical MHC-I genes *SAHA-UK* and *SAHA-MR1*, although  
347 the latter was only induced in DFT2 cells treated with IFNG. Additionally, *PDL1* was  
348 upregulated by IFNG, but not NLRC5. Examination of the promoter elements immediately  
349 upstream of *SAHA-UK* and *PDL1* did not identify the putative MHC-I-conserved SXY  
350 module<sup>51</sup> necessary for NLRC5-mediated transcription in the devil genome. A putative

351 interferon-stimulated response element (ISRE) for devil MHC-I genes was identified 127 bp  
352 upstream of the start codon of *SAHA-UK* (**Supplementary Fig. 4**).

353

354 NLRC5 did not consistently regulate MHC-II genes. However, the invariant chain associated  
355 with assembly of MHC-II complexes, *CD74*, was significantly upregulated in DFT1.NLRC5.  
356 Similarly, IFNG treatment on DFT1 cells only upregulated MHC-II transactivator *CIITA*.  
357 Strikingly, IFNG treatment on DFT2 cells induced several MHC-II genes such as *HLA-DRA*  
358 (*LOC100923003*), *HLA-DMA* (*LOC100925801*), *HLA-DMB* (*LOC100925533*), *CD74* and  
359 *CIITA*.

360

361 **NLRC5 primarily functions in MHC-I antigen processing and presentation but is not**  
362 **limited to immune-related functions**

363 The majority of research into NLRC5 has been devoted to its role as a regulator of MHC-I  
364 expression. In addition, some studies have reported possible roles of NLRC5 in antiviral  
365 immunity, inflammation and cancer through modulation of various signaling pathways<sup>52-57</sup>. To  
366 identify additional biological functions of NLRC5 in DFT cells, over-representation analysis  
367 of gene ontology (GO) biological processes and Reactome pathways was performed using the  
368 list of differentially expressed genes between NLRC5-overexpressing DFT cells and BFP-  
369 controls (FDR < 0.05, log<sub>2</sub>FC ≥ 2.0 or ≤ -2.0). Both analyses revealed significant up- and  
370 downregulation of genes associated with immune system processes and developmental  
371 processes in cells overexpressing NLRC5.

372

373 Among the list of genes upregulated in DFT1.NLRC5 and DFT2.NLRC5 cells, the most  
374 significantly associated GO biological process was *antigen processing and presentation of*  
375 *exogenous peptide antigen via MHC class I, TAP-dependent* (**Figs. 4A** and **5A**). Several  
376 additional immune-related processes were also associated with NLRC5 overexpression,  
377 particularly in DFT1 cells. Some of these included *positive regulation of immune response*,  
378 *interferon-gamma-mediated signaling pathway*, *immune response-regulating cell surface*  
379 *receptor signaling pathway* (**Fig. 4A**), and *regulation of interleukin-6 biosynthetic process*  
380 (**Fig. 4C**). In DFT1.NLRC5 and DFT2.NLRC5, GO terms related to development that were  
381 significantly over-represented included *morphogenesis of an epithelium* (**Fig. 4A**) and *negative*  
382 *regulation of epidermis development* (**Fig. 5A**), respectively.

383

384 As DFT cells are of neuroendocrine origin, specifically of the Schwann cell lineage<sup>5,6</sup>, a  
385 number of neural-related genes were targeted by NLRC5. In DFT2 cells, NLRC5 upregulated  
386 genes that are involved in *myelination*, which are usually expressed at low levels in DFT2 cells<sup>6</sup>  
387 (**Fig. 5A**). These genes include brain enriched myelin associated protein 1 (*BCAS1*), myelin  
388 binding protein (*MBP*), myelin protein zero (*MPZ*) and UDP glycosyltransferase 8 (*UGT8*)  
389 (**Fig. 5B**). Furthermore, many of the downregulated genes in DFT2.NLRC5 were related to  
390 nervous system function, mainly pertaining to *synaptic signaling* and *sensory perception* (**Fig.**  
391 **5C**).

392

393 Reactome pathway analysis revealed an enrichment of pathways that were consistent with  
394 those identified by GO analysis. This included enrichment of the *ER-phagosome pathway* and  
395 *antigen processing-cross presentation* in DFT1.NLRC5 (**Table 2**) and DFT2.NLRC5 (**Table**  
396 **3**); *signaling by the B cell receptor (BCR)* in DFT1.NLRC5; and *transmission across chemical*  
397 *synapses* in DFT2.NLRC5 cells. Interestingly, nuclear factor of activated T cells 1 (*NFATC1*),  
398 protein kinase C beta (*PRKCB*), *PSMB8* and *PSMB9*, associated with several GO immune-  
399 related processes in DFT1.NLRC5 (**Fig. 4B**), were enriched for the *beta-catenin independent*  
400 *WNT signaling* pathway (**Table 2**). Other enriched pathways included those involved in  
401 extracellular matrix organization such as *collagen chain trimerization* (**Table 2**) and *assembly*  
402 *of collagen fibrils and other multimeric structures* (**Table 3**).

403

#### 404 **NLRC5 induces MHC-I expression on the cell surface**

405 To determine if NLRC5 is capable of regulating MHC-I expression at the protein level, surface  
406 MHC-I was analyzed by flow cytometry in DFT cells overexpressing NLRC5 using a  
407 monoclonal antibody against B2M<sup>8</sup>. The overexpression of NLRC5 induced upregulation of  
408 surface expression of B2M in both DFT1.NLRC5 (**Fig. 6A**) and DFT2.NLRC5 cells (**Fig. 6B**).  
409 The level of B2M expression was also comparable to wild-type DFT cells treated with IFNG.

410

411 Next, we assessed the stability of NLRC5-induced MHC-I expression by examining the  
412 expression of B2M in long-term cultures. One-month post-drug selection, DFT1.NLRC5 cells  
413 cultured in the presence or absence of hygromycin B were stained for B2M every four weeks  
414 for a total of 12 weeks. As shown in **Fig. 6A**, MHC-I expression was stably maintained in  
415 DFT1.NLRC5 cells, with or without ongoing drug selection pressure throughout the 12-week  
416 culture thus, demonstrating the relative stability of the human EF1a promoter driving NLRC5  
417 expression in long-term cell cultures. PDL1 was also not upregulated on the cell surface in

418 NLRC5-overexpressing DFT cells compared to IFNG-treated DFT cells (**Supplementary Fig.**  
419 **5**).

420

### 421 **MHC-I is a predominant target of anti-DFT antibody responses**

422 It was previously reported that the antibodies from devils infected with DFT1 were specific to  
423 MHC-I, as determined by incubating serum from these devils with IFNG-treated DFT cells<sup>12</sup>.  
424 Considering the diverse roles of IFNG, there could be other IFNG-induced antigens that can  
425 serve as targets for the anti-DFT antibody response.

426

427 To establish if MHC-I is the target of anti-DFT serum antibodies, surface MHC-I expression  
428 was first ablated by knocking out the hemizygous *B2M* allele<sup>10</sup> in wild-type DFT1 cells  
429 (DFT1.WT) and NLRC5-overexpressing DFT1 cells (DFT1.NLRC5) using CRISPR/Cas9  
430 technology. Gene disruption of *B2M* was confirmed by genomic DNA sequencing  
431 (**Supplementary Fig. 2**), and flow cytometry using a monoclonal anti-B2M antibody (**Fig. 7**).  
432 CRISPR/Cas9-mediated *B2M* knockout ( $B2M^{-/-}$ ) in DFT1 cells rendered the cells irreversibly  
433 deficient for surface expression of B2M despite IFNG and NLRC5 stimulation (DFT1. $B2M^{-/-}$   
434 + IFNG and DFT1.NLRC5. $B2M^{-/-}$ ). Due to the pivotal role of B2M in stability of MHC-I  
435 complex formation and surface presentation<sup>58-62</sup>, absence of surface B2M is indicative of a lack  
436 of surface MHC-I expression.

437

438 After surface MHC-I ablation was confirmed, serum from six wild devils (TD1–TD6) that  
439 demonstrated anti-DFT responses including natural DFT1 regressions<sup>12</sup> was tested against  
440 *B2M* knockout cell lines DFT1. $B2M^{-/-}$  and DFT1.NLRC5. $B2M^{-/-}$ . Serum from a healthy devil  
441 (TD7) and an immunized devil with induced tumor regression (My)<sup>48</sup> were used as negative  
442 and positive controls for antibody binding. All six sera from DFTD<sup>+</sup> devils (TD1–TD6) showed  
443 weak to no binding to DFT1.WT and DFT1.BFP, which are inherently negative for surface  
444 MHC-I (**Fig. 7**). With forced expression of MHC-I using IFNG (DFT1.WT + IFNG) and  
445 NLRC5 (DFT1.NLRC5), a positive shift in antibody binding was observed. There was no  
446 apparent difference in the level of antibody binding between IFNG-treated and NLRC5-  
447 overexpressing DFT1 cells, suggesting a similarity between the antibody target(s) induced by  
448 IFNG and NLRC5. Following *B2M* knockout, antibody binding of all six sera was reduced in  
449 both IFNG-induced (DFT1. $B2M^{-/-}$  + IFNG) and NLRC5-induced *B2M* knockout DFT1 cells  
450 (DFT1.NLRC5. $B2M^{-/-}$ ), suggesting that MHC-I is a target of DFT1-specific antibody  
451 responses in natural tumor regressions.



452

## 453 **DISCUSSION**

454 Overexpression of NLRC5 in DFT cells has revealed a major and evolutionarily conserved role  
455 for NLRC5 in MHC-I antigen processing and presentation. Consistent with studies in human  
456 and mouse cell lines<sup>9,18,63–65</sup>, NLRC5 induced expression of classical MHC-I genes (*SAHAI-*  
457 *01*, *SAHAI (LOC105750614)*, *SAHAI (LOC100927947)*), *B2M*, *PSMB8*, *PSMB9* and *TAP1* in  
458 both DFT1 and DFT2 cells. Despite the lack of increase in *TAP2* expression, the selective  
459 upregulation of MHC-I and other functionally-related genes by NLRC5 was sufficient to  
460 restore MHC-I molecules on the cell surface. Although the peptide transport function of TAP  
461 proteins typically involves the formation of TAP1 and TAP2 heterodimers, homodimerization  
462 of TAP proteins have been described<sup>66,67</sup>. However, the functionality of TAP1 homodimers  
463 remains to be verified. The conservation of genes of the MHC-I pathway, regulated by NLRC5  
464 across species, highlights the important role of NLRC5 in MHC-I regulation.

465

466 Previous studies have shown that sera from wild devils with anti-DFT immune responses  
467 contained high titers of antibody that bound to IFNG-treated DFT1 cells. It was proposed that  
468 the primary antibody targets were MHC-I proteins<sup>12</sup>. Additionally, some of these devils  
469 experienced tumor regression despite the lack of strong evidence for immune cell infiltration  
470 into tumors. The function of NLRC5 that is mainly restricted to MHC-I regulation compared  
471 with IFNG provided an opportunity to re-examine antibody target(s) of serum antibodies from  
472 wild devils burdened with DFTs. A clear understanding of immunogenic targets of DFTs will  
473 provide direction for a more effective vaccine against DFTs.

474

475 The MHC-I complex was identified as the predominant target of anti-DFT serum antibodies.  
476 The antibody binding intensity against NLRC5-overexpressing DFT cells was similar to IFNG-  
477 treated DFT cells, suggesting similar levels of target antigen expression. When MHC-I  
478 expression was ablated through *B2M* knockout, antibody binding was reduced to almost  
479 background levels despite IFNG and NLRC5 stimulation. This discovery presents an option to  
480 exploit NLRC5 for induction of anti-DFT immunity via MHC-I expression, potentiated by the  
481 humoral anti-tumor response in Tasmanian devils. Although cellular immunity is likely a key  
482 mechanism for tumor rejection, B cells and antibodies can play eminent roles in transplant  
483 rejection<sup>68</sup> and anti-tumor immunity<sup>69</sup>. B cells can promote rejection through antibody-  
484 dependent mechanisms that facilitate FcR-mediated phagocytosis by macrophages, antibody-  
485 dependent cellular cytotoxicity (ADCC) by NK cells, complement activation and antigen

486 uptake by dendritic cells (reviewed by Yuen et al.)<sup>70</sup>. Moreover, B cells can enhance immune  
487 surveillance and response through direct antigen presentation to T cells and production of  
488 immune-modulating molecules such as cytokines and chemokines<sup>70</sup>.

489

490 Caldwell et al. reported that the most highly expressed MHC alleles on DFT2 cells are those  
491 that matched host MHC alleles<sup>14</sup>, which suggests that DFT cells may hide from host defenses  
492 or induce immunological tolerance via shared MHC alleles. If MHC-I is the major antibody  
493 target and potentially the overall immune system target, devils having the largest MHC  
494 mismatch with DFT cells will be the most likely to have strong MHC-I specific responses and  
495 reject DFTs, leading to natural selection in the wild. For example, previous studies have shown  
496 that some devils have no functional MHC-I allele at the UA loci and that these individuals can  
497 be homozygous at the UB and UC loci<sup>48</sup>. These individuals present a reduced MHC-peptide  
498 that would have the lowest probability of a match to the DFT MHC alleles that induce host  
499 DFT1 tolerance. However, selection for reduced genetic diversity in MHC alleles would be  
500 unfavorable for long-term conservation. A prophylactic vaccine would ideally be designed to  
501 assist in the preservation of the genetic diversity of wild devils<sup>71</sup>.

502

503 Although the MHC proteins themselves are likely a primary target of humoral and cellular  
504 immunity, MHC-I alleles generally differ by only a few amino acids<sup>14,72</sup>. Mutations in DFTs  
505 and somatic variation between host and tumor cells provide a rich source of additional antigenic  
506 targets for humoral and cellular immunity<sup>10</sup>. The reduction in antibody binding to *B2M*  
507 knockout cells suggests that these tumor antigens are unlikely to be the primary antibody  
508 targets, although binding of antibodies to peptide-MHC complexes cannot be excluded.  
509 Knocking out individual MHC alleles in DFT cells or overexpression of MHC alleles in  
510 alternative non-DFT cell lines could be used to disentangle the importance of specific alleles  
511 and investigate the potential for peptide-MHC complexes to be antibody targets.

512

513 Our results confirm that IFNG affects more immunoregulatory processes than NLRC5.  
514 However, the functional dichotomy of IFNG in cancer means that NLRC5 modulation could  
515 be an alternative to IFNG treatment for enhancing tumor cell immunogenicity in a range of  
516 species, including human. Importantly, NLRC5 upregulated B2M on the surface of DFT cells  
517 to similar levels as IFNG, but it does not upregulate inhibitory molecules. The restoration of  
518 functional MHC-I molecules without concomitant upregulation of PDL1 and SAHA-UK has  
519 multiple advantages over IFNG for triggering effective cytotoxic responses against DFT cells.

520 First, cells transfected with NLRC5 constitutively express MHC-I and therefore do not require  
521 culturing in IFNG, which can be problematic as IFNG can also reduce cell viability<sup>17</sup>. Second,  
522 PDL1 negatively regulates T cell responses by inducing T cell anergy<sup>73</sup> and apoptosis<sup>74</sup> while  
523 limiting T cell activity<sup>75</sup>. Moreover, PDL1 promotes tumor growth and survival by stimulating  
524 cell proliferation<sup>76</sup> and resistance to T cell killing<sup>77,78</sup>. Third, the expression of monomorphic  
525 MHC-I SAHA-UK induced by IFNG would allow DFT cells to escape cytotoxic attack from  
526 both NK cells and CD8<sup>+</sup> T cells<sup>79</sup>. Fourth, several other immune checkpoint protein receptor-  
527 ligand interactions were recently shown to be conserved in devils<sup>80,81</sup>, but we found no  
528 significant upregulation of these genes by NLRC5. The ability to improve tumor  
529 immunogenicity in the absence of inhibitory signals has positive implications for immunization  
530 and immunotherapeutic strategies. NLRC5 could evoke protective anti-tumor immunity  
531 against DFTs, similar to NLRC5-expressing B16-F10 melanoma cells in mice<sup>64</sup>.

532

533 The absence of a regulatory effect on *SAHA-UK* and *PDL1* by NLRC5 in contrast to IFNG  
534 could be due to the composition of the promoter elements of these genes. The promoter of  
535 MHC class I genes consists of three conserved cis-regulatory elements: a NFκB-binding  
536 Enhancer A region, an interferon-stimulated response element (ISRE) and a SXY module<sup>82,83</sup>.  
537 The SXY module is critical for NLRC5-mediated MHC-I transactivation as it serves as the  
538 binding site for the multi-protein complex formed between NLRC5 and various transcription  
539 factors<sup>19,21,84</sup>. An ISRE and SXY module is present within 200 base pairs of the start codon for  
540 all three classical devil MHC-I genes<sup>51</sup>. We identified an ISRE element in the *SAHA-UK*  
541 promoter region but were unable to identify an SXY module in this region. This could explain  
542 the upregulation of *SAHA-UK* upon IFNG stimulation but not in NLRC5-overexpressing DFT  
543 cells. Similarly, the SXY module was not identified in orthologues of *SAHA-UK*, which are  
544 *Modo-UK* in the grey short-tailed opossum<sup>85</sup> and *Maeu-UK* in the tammar wallaby<sup>86</sup>. The  
545 difference in regulation and therefore, pattern of expression of the UK gene in marsupials<sup>85-87</sup>  
546 may reflect a separate function from classical MHC-I. The marsupial UK gene has been  
547 hypothesized to play a marsupial-specific role in conferring immune protection to vulnerable  
548 newborn marsupials during their pouch life<sup>86</sup>. SXY modules are typically not found in the  
549 promoter region of *PDL1*<sup>88</sup> therefore, it is not expected for NLRC5 to be a regulator of *PDL1*.  
550 Rather, IFNG-mediated induction of *PDL1* occurs via transcription factor interferon regulatory  
551 factor 1 (IRF-1)<sup>88</sup>, which is induced by STAT1<sup>89</sup>.

552

553 Beyond MHC-I regulation, NLRC5 expression in DFT1 cells displayed other beneficial  
554 immune-regulating functions, mainly via the non-canonical  $\beta$ -catenin-independent WNT  
555 signaling pathway. One of the downstream effectors that was upregulated by NLRC5 included  
556 *PRKCB*, an activator of NF $\kappa$ B in B cells<sup>90</sup>. NF $\kappa$ B is a family of pleiotropic transcription factors  
557 known to regulate several immune and inflammatory responses including cellular processes  
558 such as cell proliferation and apoptosis<sup>91</sup>. In recent years, aberrations in NF $\kappa$ B signaling have  
559 been implicated in cancer development and progression<sup>92,93</sup>. The regulation of NF $\kappa$ B signaling  
560 by NLRC5 has been documented in several studies although the findings have been  
561 contradictory<sup>54,55,94,95</sup>.

562

563 In summary, we have demonstrated the role of NLRC5 in MHC-I regulation of DFT cells  
564 thereby, displaying the functional conservation of NLRC5 across species. The finding that  
565 MHC-I is a major antibody target in wild devils with anti-DFT response and natural DFT  
566 regression can help guide DFTD vaccine development and conservation management  
567 strategies. NLRC5-overexpressing DFT cells can be harnessed to elicit both cellular and  
568 humoral immunity against future and pre-existing DFT infections in wild devils using MHC-I  
569 as a target. Given the prevalence of altered MHC-I expression in cancer as a form of immune  
570 escape mechanism<sup>96-98</sup>, NLRC5 presents as a new target for providing an insight into the role  
571 of MHC-I in cancer as well as transplantation, and its manipulation for human cancer treatment  
572 and transplant tolerance.

573

#### 574 **ACKNOWLEDGEMENTS**

575 The authors would like to thank Patrick Lennard, Peter Murphy, and Candida Wong for  
576 assistance in the lab and Terry Pinfold for assistance in flow cytometry. We thank Hannah  
577 Siddle for supplying the monoclonal antibody for B2M and for offering her expertise in devil  
578 MHC-I immunogenetics. We wish to thank G. Ralph for ongoing care of Tasmanian devils,  
579 the Bonorong Wildlife Sanctuary for providing access to Tasmanian devils, and R. Pye for  
580 providing care for devils and collecting blood samples. This work was supported by ARC  
581 DECRA grant # DE180100484 and ARC Discovery grant # DP180100520, University of  
582 Tasmania Foundation Dr. Eric Guiler Tasmanian Devil Research Grant through funds raised  
583 by the Save the Tasmanian Devil Appeal (2013, 2015, 2017).

584

#### 585 **AUTHOR CONTRIBUTIONS**

586 ABL, ALP, ASF, CEBO and GMW designed the study. ALP, ASF, CEBO, GSL, JC, and JMD  
587 developed the technology. CEBO and JMD performed the experiments. ALP and CEBO  
588 performed bioinformatic analyses. CEBO created the figures. ALP, ASF, and CEBO analyzed  
589 the data. CEBO wrote the manuscript, and all authors edited the manuscript.

590

591 **CONFLICT OF INTEREST**

592 The authors declare that the research was conducted in the absence of any commercial or  
593 financial relationships that could be construed as a potential conflict of interest.

594 **REFERENCES**

- 595 1 Jones ME, Paetkau D, Geffen E, Moritz C. Genetic diversity and population structure  
596 of Tasmanian devils, the largest marsupial carnivore. *Mol Ecol* 2004; **13**: 2197–2209.
- 597 2 Loh R, Hayes D, Mahjoor A, O’Hara A, Pyecroft S, Raidal S. The  
598 Immunohistochemical Characterization of Devil Facial Tumor Disease (DFTD) in the  
599 Tasmanian Devil (*Sarcophilus harrisii*). *Vet Pathol* 2006; **43**: 896–903.
- 600 3 Pearse A-M, Swift K. Allograft theory: Transmission of devil facial-tumour disease.  
601 *Nature* 2006; **439**: 549.
- 602 4 Pye RJ, Pemberton D, Tovar C, Tubio JMC, Dun KA, Fox S *et al*. A second  
603 transmissible cancer in Tasmanian devils. *Proc Natl Acad Sci U S A* 2016; **113**: 374–  
604 379.
- 605 5 Murchison EP, Tovar C, Hsu A, Bender HS, Kheradpour P, Rebbeck CA *et al*. The  
606 Tasmanian devil transcriptome reveals Schwann cell origins of a clonally transmissible  
607 cancer. *Science* 2010; **327**: 84–87.
- 608 6 Patchett AL, Coorens THH, Darby J, Wilson R, McKay MJ, Kamath KS *et al*. Two of  
609 a kind: transmissible Schwann cell cancers in the endangered Tasmanian devil  
610 (*Sarcophilus harrisii*). *Cell Mol Life Sci* 2020; **77**: 1847–1858.
- 611 7 Lazenby BT, Tobler MW, Brown WE, Hawkins CE, Hocking GJ, Hume F *et al*.  
612 Density trends and demographic signals uncover the long-term impact of transmissible  
613 cancer in Tasmanian devils. *J Appl Ecol* 2018; **55**: 1368–1379.
- 614 8 Siddle H V, Kreiss A, Tovar C, Yuen CK, Cheng Y, Belov K *et al*. Reversible  
615 epigenetic down-regulation of MHC molecules by devil facial tumour disease  
616 illustrates immune escape by a contagious cancer. *Proc Natl Acad Sci U S A* 2013;  
617 **110**: 5103–5108.
- 618 9 Yoshihama S, Roszik J, Downs I, Meissner TB, Vijayan S, Chapuy B *et al*.  
619 NLRC5/MHC class I transactivator is a target for immune evasion in cancer. *Proc Natl*  
620 *Acad Sci U S A* 2016; **113**: 5999–6004.
- 621 10 Stammnitz MR, Coorens THH, Gori KC, Hayes D, Fu B, Wang J *et al*. The Origins  
622 and Vulnerabilities of Two Transmissible Cancers in Tasmanian Devils. *Cancer Cell*  
623 2018; **33**: 607-619.e15.
- 624 11 Brown GK, Kreiss A, Lyons AB, Woods GM. Natural killer cell mediated cytotoxic  
625 responses in the Tasmanian devil. *PLoS One* 2011; **6**: e24475.
- 626 12 Pye R, Hamede R, Siddle H V., Caldwell A, Knowles GW, Swift K *et al*.  
627 Demonstration of immune responses against devil facial tumour disease in wild



- 628 Tasmanian devils. *Biol Lett* 2016; **12**: 20160553.
- 629 13 Pye R, Patchett A, McLennan E, Thomson R, Carver S, Fox S *et al.* Immunization  
630 Strategies Producing a Humoral IgG Immune Response against Devil Facial Tumor  
631 Disease in the Majority of Tasmanian Devils Destined for Wild Release. *Front*  
632 *Immunol* 2018; **9**: 259.
- 633 14 Caldwell A, Coleby R, Tovar C, Stammnitz MR, Kwon YM, Owen RS *et al.* The  
634 newly-arisen Devil facial tumour disease 2 (DFT2) reveals a mechanism for the  
635 emergence of a contagious cancer. *Elife* 2018; **7**: e35314.
- 636 15 Zaidi MR. The Interferon-Gamma Paradox in Cancer. *J Interf Cytokine Res* 2019; **39**:  
637 30–38.
- 638 16 Flies AS, Lyons AB, Corcoran LM, Papenfuss AT, Murphy JM, Knowles GW *et al.*  
639 PD-L1 is not constitutively expressed on Tasmanian devil facial tumor cells but is  
640 strongly upregulated in response to IFN- $\gamma$  and can be expressed in the tumor  
641 microenvironment. *Front Immunol* 2016; **7**: 581.
- 642 17 Ong CEB, Lyons AB, Woods GM, Flies AS. Inducible IFN- $\gamma$  Expression for MHC-I  
643 Upregulation in Devil Facial Tumor Cells. *Front Immunol* 2019; **9**: 3117.
- 644 18 Meissner TB, Li A, Biswas A, Lee K-H, Liu Y-J, Bayir E *et al.* NLR family member  
645 NLRC5 is a transcriptional regulator of MHC class I genes. *Proc Natl Acad Sci U S A*  
646 2010; **107**: 13794–13799.
- 647 19 Meissner TB, Liu Y-J, Lee K-H, Li A, Biswas A, van Eggermond MCJA *et al.*  
648 NLRC5 cooperates with the RFX transcription factor complex to induce MHC class I  
649 gene expression. *J Immunol* 2012; **188**: 4951–4958.
- 650 20 Gobin SJP, van Zutphen M, Westerheide SD, Boss JM, van den Elsen PJ. The MHC-  
651 specific enhanceosome and its role in MHC class I and  $\beta$ 2-microglobulin gene  
652 transactivation. *J Immunol* 2001; **167**: 5175–5184.
- 653 21 Neerincx A, Rodriguez GM, Steimle V, Kufer TA. NLRC5 controls basal MHC class I  
654 gene expression in an MHC enhanceosome-dependent manner. *J Immunol* 2012; **188**:  
655 4940–4950.
- 656 22 Benkő S, Kovács EG, Hezel F, Kufer TA. NLRC5 Functions beyond MHC I  
657 Regulation-What Do We Know So Far? *Front Immunol* 2017; **8**: 150.
- 658 23 Pearse A-M, Swift K, Hodson P, Hua B, McCallum H, Pyecroft S *et al.* Evolution in a  
659 transmissible cancer: a study of the chromosomal changes in devil facial tumor (DFT)  
660 as it spreads through the wild Tasmanian devil population. *Cancer Genet* 2012; **205**:  
661 101–112.

- 662 24 Patchett AL, Wilson R, Charlesworth JC, Corcoran LM, Papenfuss AT, Lyons BA *et*  
663 *al.* Transcriptome and proteome profiling reveals stress-induced expression signatures  
664 of imiquimod-treated Tasmanian devil facial tumor disease (DFTD) cells. *Oncotarget*  
665 2018; **9**: 15895–15914.
- 666 25 Andrews S. FastQC: A Quality Control tool for High Throughput Sequence Data.  
667 2010.<https://www.bioinformatics.babraham.ac.uk/projects/fastqc/>.
- 668 26 Liao Y, Smyth GK, Shi W. The Subread aligner: fast, accurate and scalable read  
669 mapping by seed-and-vote. *Nucleic Acids Res* 2013; **41**: e108–e108.
- 670 27 Liao Y, Smyth GK, Shi W. featureCounts: an efficient general purpose program for  
671 assigning sequence reads to genomic features. *Bioinformatics* 2014; **30**: 923–930.
- 672 28 RStudio Team. RStudio: Integrated Development Environment for R.  
673 2020.<http://www.rstudio.com/>.
- 674 29 R Core Team. R: A Language and Environment for Statistical Computing.  
675 2020.<https://www.r-project.org/>.
- 676 30 Robinson MD, McCarthy DJ, Smyth GK. edgeR: A Bioconductor package for  
677 differential expression analysis of digital gene expression data. *Bioinformatics* 2009;  
678 **26**: 139–140.
- 679 31 Robinson MD, Oshlack A. A scaling normalization method for differential expression  
680 analysis of RNA-seq data. *Genome Biol* 2010; **11**: R25.
- 681 32 Anders S, Huber W. Differential expression analysis for sequence count data. *Genome*  
682 *Biol* 2010; **11**: R106.
- 683 33 Bullard JH, Purdom E, Hansen KD, Dudoit S. Evaluation of statistical methods for  
684 normalization and differential expression in mRNA-Seq experiments. *BMC*  
685 *Bioinformatics* 2010; **11**: 94.
- 686 34 Risso D, Schwartz K, Sherlock G, Dudoit S. GC-Content Normalization for RNA-Seq  
687 Data. *BMC Bioinformatics* 2011; **12**: 480.
- 688 35 Law CW, Chen Y, Shi W, Smyth GK. voom: Precision weights unlock linear model  
689 analysis tools for RNA-seq read counts. *Genome Biol* 2014; **15**: R29.
- 690 36 Ritchie ME, Phipson B, Wu D, Hu Y, Law CW, Shi W *et al.* *limma* powers differential  
691 expression analyses for RNA-sequencing and microarray studies. *Nucleic Acids Res*  
692 2015; **43**: e47.
- 693 37 Phipson B, Lee S, Majewski IJ, Alexander WS, Smyth GK. Robust hyperparameter  
694 estimation protects against hypervariable genes and improves power to detect  
695 differential expression. *Ann Appl Stat* 2016; **10**: 946–963.

- 696 38 Oliveros JC. Venny. An interactive tool for comparing lists with Venn's diagrams.  
697 2015.<https://bioinfogp.cnb.csic.es/tools/venny/index.html>.
- 698 39 Gu Z, Eils R, Schlesner M. Complex heatmaps reveal patterns and correlations in  
699 multidimensional genomic data. *Bioinformatics* 2016; **32**: 2847–2849.
- 700 40 Yu G, Wang LG, Han Y, He QY. ClusterProfiler: An R package for comparing  
701 biological themes among gene clusters. *Omi A J Integr Biol* 2012; **16**: 284–287.
- 702 41 Yu G, He QY. ReactomePA: An R/Bioconductor package for reactome pathway  
703 analysis and visualization. *Mol Biosyst* 2016; **12**: 477–479.
- 704 42 Kowarz E, Löscher D, Marschalek R. Optimized Sleeping Beauty transposons rapidly  
705 generate stable transgenic cell lines. *Biotechnol J* 2015; **10**: 647–653.
- 706 43 Flies AS, Darby JM, Murphy PR, Pinfeld TL, Patchett AL, Lennard PR. Generation  
707 and Testing of Fluorescent Adaptable Simple Theranostic (FAST) Proteins. *Bio-*  
708 *protocol* 2020; **10**: e3696.
- 709 44 Mátés L, Chuah MKL, Belay E, Jerchow B, Manoj N, Acosta-Sanchez A *et al*.  
710 Molecular evolution of a novel hyperactive Sleeping Beauty transposase enables  
711 robust stable gene transfer in vertebrates. *Nat Genet* 2009; **41**: 753–761.
- 712 45 Labun K, Montague TG, Krause M, Torres Cleuren YN, Tjeldnes H, Valen E.  
713 CHOPCHOP v3: Expanding the CRISPR web toolbox beyond genome editing.  
714 *Nucleic Acids Res* 2019; **47**: W171–W174.
- 715 46 Sanjana NE, Shalem O, Zhang F. Improved vectors and genome-wide libraries for  
716 CRISPR screening. *Nat Methods* 2014; **11**: 783–784.
- 717 47 Synthego. Synthego Performance Analysis, ICE Analysis.  
718 2019.<https://www.synthego.com/products/bioinformatics/crispr-analysis> (accessed 31  
719 Jul2020).
- 720 48 Tovar C, Pye RJ, Kreiss A, Cheng Y, Brown GK, Darby J *et al*. Regression of devil  
721 facial tumour disease following immunotherapy in immunised Tasmanian devils. *Sci*  
722 *Rep* 2017; **7**: 43827.
- 723 49 Howson LJ, Morris KM, Kobayashi T, Tovar C, Kreiss A, Papenfuss AT *et al*.  
724 Identification of dendritic cells, B cell and T cell subsets in Tasmanian devil lymphoid  
725 tissue; evidence for poor immune cell infiltration into devil facial tumors. *Anat Rec*  
726 *(Hoboken)* 2014; **297**: 925–938.
- 727 50 Tovar C, Obendorf D, Murchison EP, Papenfuss AT, Kreiss A, Woods GM. Tumor-  
728 specific diagnostic marker for transmissible facial tumors of Tasmanian devils:  
729 immunohistochemistry studies. *Vet Pathol* 2011; **48**: 1195–1203.

- 730 51 Cheng Y, Stuart A, Morris K, Taylor R, Siddle H, Deakin J *et al.* Antigen-presenting  
731 genes and genomic copy number variations in the Tasmanian devil MHC. *BMC*  
732 *Genomics* 2012; **13**: 87.
- 733 52 Kuenzel S, Till A, Winkler M, Häsler R, Lipinski S, Jung S *et al.* The nucleotide-  
734 binding oligomerization domain-like receptor NLRC5 is involved in IFN-dependent  
735 antiviral immune responses. *J Immunol* 2010; **184**: 1990–2000.
- 736 53 Neerincx A, Lautz K, Menning M, Kremmer E, Zigrino P, Hösel M *et al.* A role for  
737 the human nucleotide-binding domain, leucine-rich repeat-containing family member  
738 NLRC5 in antiviral responses. *J Biol Chem* 2010; **285**: 26223–26232.
- 739 54 Cui J, Zhu L, Xia X, Wang HY, Legras X, Hong J *et al.* NLRC5 negatively regulates  
740 the NF-kappaB and type I interferon signaling pathways. *Cell* 2010; **141**: 483–496.
- 741 55 Benko S, Magalhaes JG, Philpott DJ, Girardin SE. NLRC5 Limits the Activation of  
742 Inflammatory Pathways. *J Immunol* 2010; **185**: 1681–1691.
- 743 56 Davis BK, Roberts RA, Huang MT, Willingham SB, Conti BJ, Brickey WJ *et al.*  
744 Cutting edge: NLRC5-dependent activation of the inflammasome. *J Immunol* 2011;  
745 **186**: 1333–1337.
- 746 57 Wang J quan, Liu Y ru, Xia Q, Chen R nan, Liang J, Xia Q rong *et al.* Emerging roles  
747 for NLRC5 in immune diseases. *Front. Pharmacol.* 2019; **10**: 1352.
- 748 58 Boyd LF, Kozlowski S, Margulies DH. Solution binding of an antigenic peptide to a  
749 major histocompatibility complex class I molecule and the role of  $\beta_2$ -microglobulin.  
750 *Proc Natl Acad Sci U S A* 1992; **89**: 2242–2246.
- 751 59 Kozlowski S, Takeshita T, Boehncke WH, Takahashi H, Boyd LF, Germain RN *et al.*  
752 Excess  $\beta_2$  microglobulin promoting functional peptide association with purified  
753 soluble class I MHC molecules. *Nature* 1991; **349**: 74–77.
- 754 60 Vitiello A, Potter TA, Sherman LA. The role of beta 2-microglobulin in peptide  
755 binding by class I molecules. *Science (80- )* 1990; **250**: 1423–1426.
- 756 61 Williams DB, Barber BH, Flavell RA, Allen H. Role of beta 2-microglobulin in the  
757 intracellular transport and surface expression of murine class I histocompatibility  
758 molecules.[erratum appears in *J Immunol* 1989 Jul 15;143(2):761]. *J Immunol* 1989;  
759 **142**: 2796–2806.
- 760 62 Arce-Gomez B, Jones EA, Barnstable CJ, Solomon E, Bodmer WF. The Genetic  
761 Control of HLA-A and B Antigens in Somatic Cell Hybrids: Requirement for  $\beta_2$   
762 Microglobulin. *Tissue Antigens* 1978; **11**: 96–112.
- 763 63 Biswas A, Meissner TB, Kawai T, Kobayashi KS. Cutting edge: impaired MHC class I

- 764 expression in mice deficient for NLRC5/class I transactivator. *J Immunol* 2012; **189**:  
765 516–520.
- 766 64 Rodriguez GM, Bobbala D, Serrano D, Mayhue M, Champagne A, Saucier C *et al.*  
767 NLRC5 elicits antitumor immunity by enhancing processing and presentation of tumor  
768 antigens to CD8<sup>+</sup> T lymphocytes. *Oncoimmunology* 2016; **5**: e1151593.
- 769 65 Yao Y, Wang Y, Chen F, Huang Y, Zhu S, Leng Q *et al.* NLRC5 regulates MHC class  
770 I antigen presentation in host defense against intracellular pathogens. *Cell Res* 2012;  
771 **22**: 836–847.
- 772 66 Lapinski PE, Miller GG, Tampé R, Raghavan M. Pairing of the nucleotide binding  
773 domains of the transporter associated with antigen processing. *J Biol Chem* 2000; **275**:  
774 6831–6840.
- 775 67 Antoniou AN, Ford S, Pilley ES, Blake N, Powis SJ. Interactions formed by  
776 individually expressed TAP1 and TAP2 polypeptide subunits. *Immunology* 2002; **106**:  
777 182–189.
- 778 68 Schmitz R, Fitch ZW, Schroder PM, Choi AY, Jackson AM, Knechtle SJ *et al.* B cells  
779 in transplant tolerance and rejection: friends or foes? *Transpl Int* 2020; **33**: 30–40.
- 780 69 Nelson BH. CD20 + B Cells: The Other Tumor-Infiltrating Lymphocytes . *J Immunol*  
781 2010; **185**: 4977–4982.
- 782 70 Yuen GJ, Demissie E, Pillai S. B Lymphocytes and Cancer: A Love–Hate  
783 Relationship. *Trends in Cancer* 2016; **2**: 747–757.
- 784 71 Flies AS, Flies EJ, Fox S, Gilbert A, Johnson SR, Liu G-S *et al.* An oral bait  
785 vaccination approach for the Tasmanian devil facial tumor diseases. *Expert Rev*  
786 *Vaccines* 2020; **19**: 1–10.
- 787 72 Gastaldello A, Sh R, Bailey A, Owen R, Turner S, Kontouli A *et al.* Passage of  
788 transmissible cancers in the Tasmanian devil is due to a dominant, shared peptide  
789 motif and a limited repertoire of MHC-I allotypes. *bioRxiv* 2020.  
790 doi:10.1101/2020.07.03.184416.
- 791 73 Selenko-Gebauer N, Majdic O, Szekeres A, Höfler G, Guthann E, Korthäuer U *et al.*  
792 B7-H1 (Programmed Death-1 Ligand) on Dendritic Cells Is Involved in the Induction  
793 and Maintenance of T Cell Anergy. *J Immunol* 2003; **170**: 3637–3644.
- 794 74 Dong H, Strome SE, Salomao DR, Tamura H, Hirano F, Flies DB *et al.* Tumor-  
795 associated B7-H1 promotes T-cell apoptosis: A potential mechanism of immune  
796 evasion. *Nat Med* 2002; **8**: 793–800.
- 797 75 Butte MJ, Keir ME, Phamduy TB, Sharpe AH, Freeman GJ. Programmed death-1

- 798 ligand 1 interacts specifically with the B7-1 costimulatory molecule to inhibit T cell  
799 responses. *Immunity* 2007; **27**: 111–122.
- 800 76 Ghebeh H, Tulbah A, Mohammed S, ElKum N, Amer SM Bin, Al-Tweigeri T *et al.*  
801 Expression of B7-H1 in breast cancer patients is strongly associated with high  
802 proliferative Ki-67-expressing tumor cells. *Int J Cancer* 2007; **121**: 751–758.
- 803 77 Iwai Y, Ishida M, Tanaka Y, Okazaki T, Honjo T, Minato N. Involvement of PD-L1  
804 on tumor cells in the escape from host immune system and tumor immunotherapy by  
805 PD-L1 blockade. *Proc Natl Acad Sci U S A* 2002; **99**: 12293–12297.
- 806 78 Azuma T, Yao S, Zhu G, Flies AS, Flies SJ, Chen L. B7-H1 is a ubiquitous  
807 antiapoptotic receptor on cancer cells. *Blood* 2008; **111**: 3635–3643.
- 808 79 Kochan G, Escors D, Breckpot K, Guerrero-Setas D. Role of non-classical MHC class  
809 I molecules in cancer immunosuppression. *Oncoimmunology*. 2013; **2**: e26491.
- 810 80 Flies AS, Blackburn NB, Lyons AB, Hayball JD, Woods GM. Comparative Analysis  
811 of Immune Checkpoint Molecules and Their Potential Role in the Transmissible  
812 Tasmanian Devil Facial Tumor Disease. *Front Immunol* 2017; **8**: 513.
- 813 81 Flies AS, Darby JM, Lennard PR, Murphy PR, Ong CEB, Pinfold TL *et al.* A novel  
814 system to map protein interactions reveals evolutionarily conserved immune evasion  
815 pathways on transmissible cancers. *Sci Adv* 2020; **6**: eaba5031.
- 816 82 Van Den Elsen PJ, Gobin SJP, Van Eggermond MCJA, Peijnenburg A. Regulation of  
817 MHC class I and II gene transcription: Differences and similarities. *Immunogenetics*  
818 1998; **48**: 208–221.
- 819 83 Van Den Elsen PJ, Peijnenburg A, Van Eggermond MC j. a., Gobin SJ p. Shared  
820 regulatory elements in the promoters of MHC class I and class II genes. *Immunol*  
821 *Today* 1998; **19**: 308–312.
- 822 84 Ludigs K, Seguí-Estévez Q, Lemeille S, Ferrero I, Rota G, Chelbi S *et al.* NLRC5  
823 exclusively transactivates MHC class I and related genes through a distinctive SXY  
824 module. *PLoS Genet* 2015; **11**: e1005088.
- 825 85 Belov K, Deakin JE, Papenfuss AT, Baker ML, Melman SD, Siddle H V *et al.*  
826 Reconstructing an Ancestral Mammalian Immune Supercomplex from a Marsupial  
827 Major Histocompatibility Complex. *PLoS Biol* 2006; **4**: e46.
- 828 86 Siddle H V., Deakin JE, Coggill P, Hart E, Cheng Y, Wong ESW *et al.* MHC-linked  
829 and un-linked class I genes in the wallaby. *BMC Genomics* 2009; **10**: 310.
- 830 87 Cheng Y, Belov K. Characterisation of non-classical MHC class I genes in the  
831 Tasmanian devil (*Sarcophilus harrisii*). *Immunogenetics* 2014; **66**: 727–735.



- 832 88 Lee S-J, Jang B-C, Lee S-W, Yang Y-I, Suh S-I, Park Y-M *et al.* Interferon regulatory  
833 factor-1 is prerequisite to the constitutive expression and IFN- $\gamma$ -induced upregulation  
834 of B7-H1 (CD274). *FEBS Lett* 2006; **580**: 755–762.
- 835 89 Loke P, Allison JP. PD-L1 and PD-L2 are differentially regulated by Th1 and Th2  
836 cells. *Proc Natl Acad Sci USA* 2003; **100**: 5336–5341.
- 837 90 Saijo K, Mecklenbräuker I, Santana A, Leitger M, Schmedt C, Tarakhovsky A. Protein  
838 kinase C  $\beta$  controls nuclear factor  $\kappa$ B activation in B cells through selective regulation  
839 of the I $\kappa$ B kinase  $\alpha$ . *J Exp Med* 2002; **195**: 1647–1652.
- 840 91 Hayden MS, Ghosh S. Signaling to NF- $\kappa$ B. *Genes Dev* 2004; **18**: 2195–2224.
- 841 92 Xia L, Tan S, Zhou Y, Lin J, Wang H, Oyang L *et al.* Role of the NF $\kappa$ B-signaling  
842 pathway in cancer. *Onco Targets Ther* 2018; **11**: 2063–2073.
- 843 93 Verzella D, Pescatore A, Capece D, Vecchiotti D, Ursini MV, Franzoso G *et al.* Life,  
844 death, and autophagy in cancer: NF- $\kappa$ B turns up everywhere. *Cell Death Dis* 2020; **11**:  
845 1–14.
- 846 94 Tong Y, Cui J, Li Q, Zou J, Wang HY, Wang R-F. Enhanced TLR-induced NF- $\kappa$ B  
847 signaling and type I interferon responses in NLRC5 deficient mice. *Cell Res* 2012; **22**:  
848 822–35.
- 849 95 Liu Y ru, Yan X, Yu H xia, Yao Y, Wang J quan, Li X feng *et al.* NLRC5 promotes  
850 cell proliferation via regulating the NF- $\kappa$ B signaling pathway in Rheumatoid arthritis.  
851 *Mol Immunol* 2017; **91**: 24–34.
- 852 96 Garrido F, Cabrera T, Concha A, Glew S, Ruiz-Cabello F, Stern PL. Natural history of  
853 HLA expression during tumour development. *Immunol. Today*. 1993; **14**: 491–499.
- 854 97 Hicklin DJ, Marincola FM, Ferrone S. HLA class I antigen downregulation in human  
855 cancers: T-cell immunotherapy revives an old story. *Mol. Med. Today*. 1999; **5**: 178–  
856 186.
- 857 98 Campoli M, Ferrone S. HLA antigen changes in malignant cells: Epigenetic  
858 mechanisms and biologic significance. *Oncogene*. 2008; **27**: 5869–5885.

859 **TABLES**

860 **Table 1.** Devil facial tumor (DFT) cell lines and treatments

| ID # | Sample name                    | Parent cell line | Treatment                                                                                 |
|------|--------------------------------|------------------|-------------------------------------------------------------------------------------------|
| 1    | DFT1.WT*                       | DFT1 C5065       | Untreated                                                                                 |
| 2    | DFT1.WT + IFNG                 | DFT1 C5065       | 5 ng/mL IFNG, 24h                                                                         |
| 3    | DFT2.WT <sup>RV</sup> *        | DFT2 RV          | Untreated                                                                                 |
| 4    | DFT2.WT <sup>RV</sup> + IFNG   | DFT2 RV          | 5 ng/mL IFNG, 24h                                                                         |
| 5    | DFT1.BFP                       | DFT1 C5065       | Transfected with control vector pSBbi-BH                                                  |
| 6    | DFT1.NLRC5                     | DFT1 C5065       | Transfected with NLRC5 vector pCO1                                                        |
| 7    | DFT2.WT                        | DFT2 JV          | Untreated                                                                                 |
| 8    | DFT2.BFP                       | DFT2 JV          | Transfected with control vector pSBbi-BH                                                  |
| 9    | DFT2.NLRC5                     | DFT2 JV          | Transfected with NLRC5 vector pCO1                                                        |
| 10   | DFT1.B2M <sup>-/-</sup>        | DFT1 C5065       | Transfected with <i>B2M</i> targeting vector pAF217                                       |
| 11   | DFT1.B2M <sup>-/-</sup> + IFNG | DFT1 C5065       | Transfected with <i>B2M</i> targeting vector pAF217 and treated with 5 ng/mL IFNG for 24h |
| 12   | DFT1.NLRC5.B2M <sup>-/-</sup>  | DFT1 C5065       | Transfected with NLRC5 vector pCO1 and <i>B2M</i> targeting vector pAF218                 |

861 \*DFT1.WT data from Patchett et al., 2018<sup>24</sup> and DFT2.WT<sup>RV</sup> from Patchett et al., 2020<sup>6</sup> available  
862 through European Nucleotide Archive # PRJNA416378 and # PRJEB28680, respectively.

863 **Table 2.** Reactome pathways enriched in differentially expressed genes in DFT1.NLRC5

| Reactome ID          | Pathway                                              | Count | Term size | p-value  | p.adjust | Genes                                      |
|----------------------|------------------------------------------------------|-------|-----------|----------|----------|--------------------------------------------|
| <b>Upregulated</b>   |                                                      |       |           |          |          |                                            |
| R-HSA-1236974        | ER-Phagosome pathway                                 | 4     | 74        | 4.69E-05 | 4.75E-03 | <i>B2M, PSMB8, PSMB9, TAP1</i>             |
| R-HSA-1168372        | Downstream signaling events of B Cell Receptor (BCR) | 4     | 80        | 6.37E-05 | 4.75E-03 | <i>NFATC1, PRKCB, PSMB8, PSMB9</i>         |
| R-HSA-1236975        | Antigen processing-Cross presentation                | 4     | 81        | 6.69E-05 | 4.75E-03 | <i>B2M, PSMB8, PSMB9, TAP1</i>             |
| R-HSA-983705         | Signaling by the B Cell Receptor (BCR)               | 4     | 104       | 1.77E-04 | 9.44E-03 | <i>NFATC1, PRKCB, PSMB8, PSMB9</i>         |
| R-HSA-3858494        | Beta-catenin independent WNT signaling               | 4     | 129       | 4.06E-04 | 1.73E-02 | <i>NFATC1, PRKCB, PSMB8, PSMB9</i>         |
| R-HSA-1169091        | Activation of NF-kappaB in B cells                   | 3     | 64        | 7.19E-04 | 2.55E-02 | <i>PRKCB, PSMB8, PSMB9</i>                 |
| <b>Downregulated</b> |                                                      |       |           |          |          |                                            |
| R-HSA-216083         | Integrin cell surface interactions                   | 5     | 62        | 1.16E-05 | 4.04E-03 | <i>CDH1, COL18A1, COL6A1, COL6A2, JAM2</i> |
| R-HSA-1251985        | Nuclear signaling by ERBB4                           | 3     | 28        | 3.33E-04 | 4.93E-02 | <i>EREG, GFAP, S100B</i>                   |
| R-HSA-5173105        | O-linked glycosylation                               | 4     | 73        | 4.27E-04 | 4.93E-02 | <i>ADAMTS7, B3GNT7, GALNT13, GALNT17</i>   |
| R-HSA-913709         | O-linked glycosylation of mucins                     | 3     | 34        | 5.96E-04 | 4.93E-02 | <i>B3GNT7, GALNT13, GALNT17</i>            |
| R-HSA-8948216        | Collagen chain trimerization                         | 3     | 36        | 7.06E-04 | 4.93E-02 | <i>COL18A1, COL6A1, COL6A2</i>             |

Cut-offs p-value < 0.001 and p.adjust < 0.05 were used to display significant pathways. P-values were adjusted (p.adjust) for multiple testing using Benjamini–Hochberg method. See also Supplementary Table 9 for full list of Reactome pathways.

864

865 **Table 3.** Reactome pathways enriched in differentially expressed genes in DFT2.NLRC5

| Reactome ID          | Pathway                                                                    | Count | Term size | p-value  | p.adjust | Genes                                  |
|----------------------|----------------------------------------------------------------------------|-------|-----------|----------|----------|----------------------------------------|
| <b>Upregulated</b>   |                                                                            |       |           |          |          |                                        |
| R-HSA-1236974        | ER-Phagosome pathway                                                       | 4     | 74        | 3.43E-06 | 3.80E-04 | <i>B2M, PSMB8, PSMB9, TAP1</i>         |
| R-HSA-1236975        | Antigen processing-Cross presentation                                      | 4     | 81        | 4.93E-06 | 3.80E-04 | <i>B2M, PSMB8, PSMB9, TAP1</i>         |
| R-HSA-983169         | Class I MHC mediated antigen processing & presentation                     | 5     | 312       | 5.96E-05 | 3.06E-03 | <i>B2M, PSMB8, PSMB9, TAP1, TRIM69</i> |
| R-HSA-983170         | Antigen Presentation: Folding, assembly and peptide loading of class I MHC | 2     | 18        | 3.31E-04 | 1.27E-02 | <i>B2M, TAP1</i>                       |
| R-HSA-162909         | Host Interactions of HIV factors                                           | 3     | 119       | 6.91E-04 | 1.36E-02 | <i>B2M, PSMB8, PSMB9</i>               |
| <b>Downregulated</b> |                                                                            |       |           |          |          |                                        |
| R-HSA-112316         | Neuronal System                                                            | 33    | 276       | 1.73E-06 | 1.28E-03 | <i>see Supplementary Table 10</i>      |
| R-HSA-1474228        | Degradation of the extracellular matrix                                    | 16    | 97        | 1.82E-05 | 6.73E-03 | <i>see Supplementary Table 10</i>      |
| R-HSA-264642         | Acetylcholine Neurotransmitter Release Cycle                               | 5     | 10        | 5.87E-05 | 1.45E-02 | <i>see Supplementary Table 10</i>      |
| R-HSA-181429         | Serotonin Neurotransmitter Release Cycle                                   | 5     | 12        | 1.70E-04 | 2.27E-02 | <i>see Supplementary Table 10</i>      |
| R-HSA-181430         | Norepinephrine Neurotransmitter Release Cycle                              | 5     | 12        | 1.70E-04 | 2.27E-02 | <i>see Supplementary Table 10</i>      |
| R-HSA-112315         | Transmission across Chemical Synapses                                      | 21    | 179       | 1.84E-04 | 2.27E-02 | <i>see Supplementary Table 10</i>      |
| R-HSA-1474244        | Extracellular matrix organization                                          | 24    | 224       | 2.65E-04 | 2.80E-02 | <i>see Supplementary Table 10</i>      |
| R-HSA-166658         | Complement cascade                                                         | 6     | 21        | 4.02E-04 | 3.38E-02 | <i>see Supplementary Table 10</i>      |
| R-HSA-1296072        | Voltage gated Potassium channels                                           | 7     | 29        | 4.11E-04 | 3.38E-02 | <i>see Supplementary Table 10</i>      |
| R-HSA-2022090        | Assembly of collagen fibrils and other multimeric structures               | 9     | 49        | 5.62E-04 | 4.16E-02 | <i>see Supplementary Table 10</i>      |
| R-HSA-210500         | Glutamate Neurotransmitter Release Cycle                                   | 5     | 16        | 7.96E-04 | 4.91E-02 | <i>see Supplementary Table 10</i>      |
| R-HSA-212676         | Dopamine Neurotransmitter Release Cycle                                    | 5     | 16        | 7.96E-04 | 4.91E-02 | <i>see Supplementary Table 10</i>      |

Cut-offs p-value < 0.001 and p.adjust < 0.05 were used to display significant pathways. P-values were adjusted (p.adjust) for multiple testing using Benjamini–Hochberg method. See also Supplementary Table 10 for full list of Reactome pathways.

867 **FIGURES**

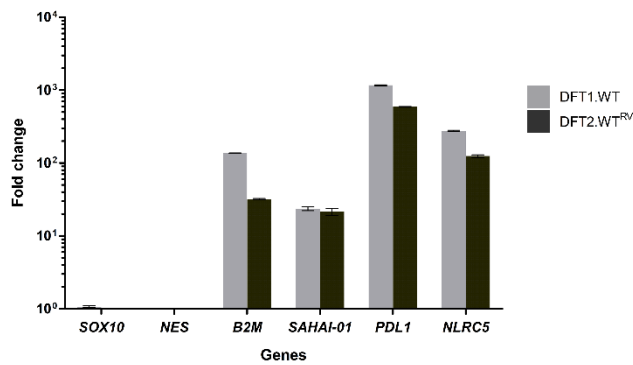

868

869 **Figure 1. Upregulation of NLRC5 by IFNG in DFT1 and DFT2 cells.** Fold change in  
870 mRNA expression (transcripts per kilobase million (TPM)) of *B2M*, MHC class I gene *SAHAI-*  
871 *01*, *PDL1* and *NLRC5* upon IFNG treatment in DFT1 C5065 cell line (DFT1.WT) and DFT2  
872 RV cell line (DFT2.WT<sup>RV</sup>). *SOX10* and *NES* were included as internal controls. Bars show the  
873 mean of *N*=2 replicates per treatment. Error bars indicate standard deviation.

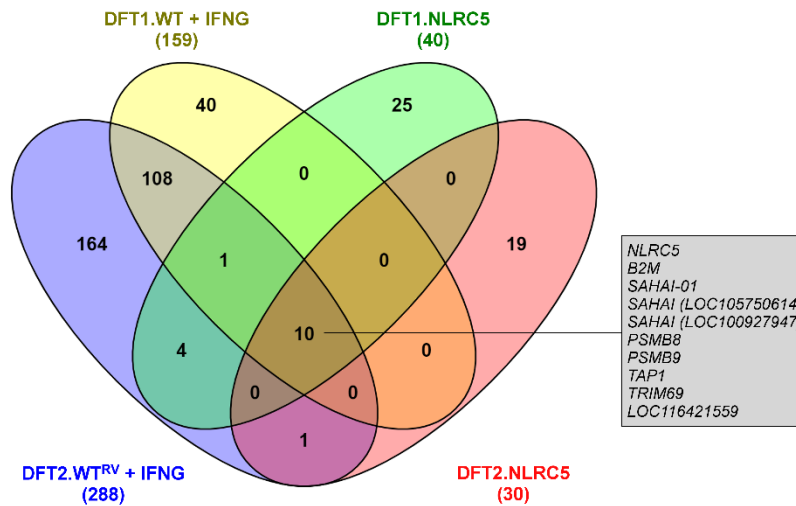

874

875 **Figure 2. Venn diagram of genes significantly upregulated upon IFNG treatment and**  
876 **NLRC5 overexpression in DFT1 and DFT2 cells.** Genes were defined as significantly  
877 upregulated when false discovery rate (FDR) < 0.05 and log<sub>2</sub>FC ≥ 2.0. Total number of genes  
878 upregulated for each treatment is indicated in parentheses under the sample name. The box  
879 shows genes upregulated in all four treatments: (i) IFNG-treated DFT1 cells (DFT1.WT +  
880 IFNG), (ii) IFNG-treated DFT2 cells (DFT2.WT<sup>RV</sup> + IFNG), (iii) NLRC5-overexpressing  
881 DFT1 cells (DFT1.NLRC5), and (iv) NLRC5-overexpressing DFT2 cells (DFT2.NLRC5). See  
882 Supplementary Table 1 for a full list of differentially expressed genes and Supplementary Table  
883 6 for description of devil-specific genes (LOC symbols).



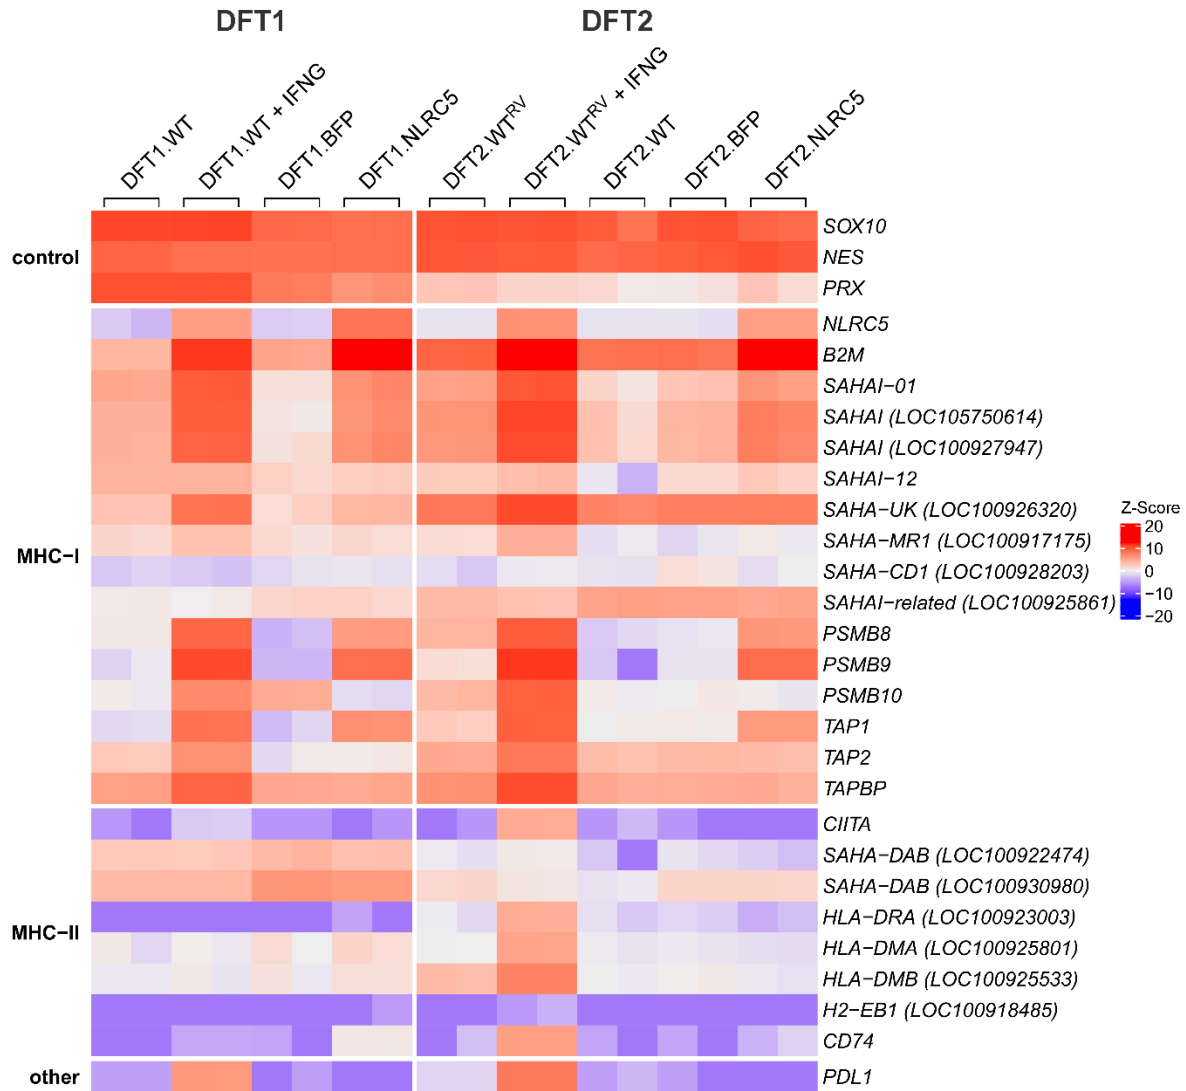

884

885 **Figure 3. Heatmap showing expression profiles of genes involved in MHC-I and MHC-II**  
 886 **antigen processing and presentation pathways, and PDL1 in IFNG-treated, and NLRC5-**  
 887 **overexpressing DFT1 and DFT2 cells. Log<sub>2</sub>TPM expression values were scaled across each**  
 888 **gene (rows) and represented by Z-Score, with red and blue representing high and low relative**  
 889 **expression, respectively. Replicates for each treatment (N=2) are included in the heatmap.**  
 890 *SAHAI* encodes the Tasmanian devil MHC-I heavy chain gene. For genes with no official gene  
 891 symbol (LOC symbols), alternative gene symbols were used according to the gene description  
 892 on NCBI. See Supplementary Table 6 for corresponding NCBI gene symbols and description.

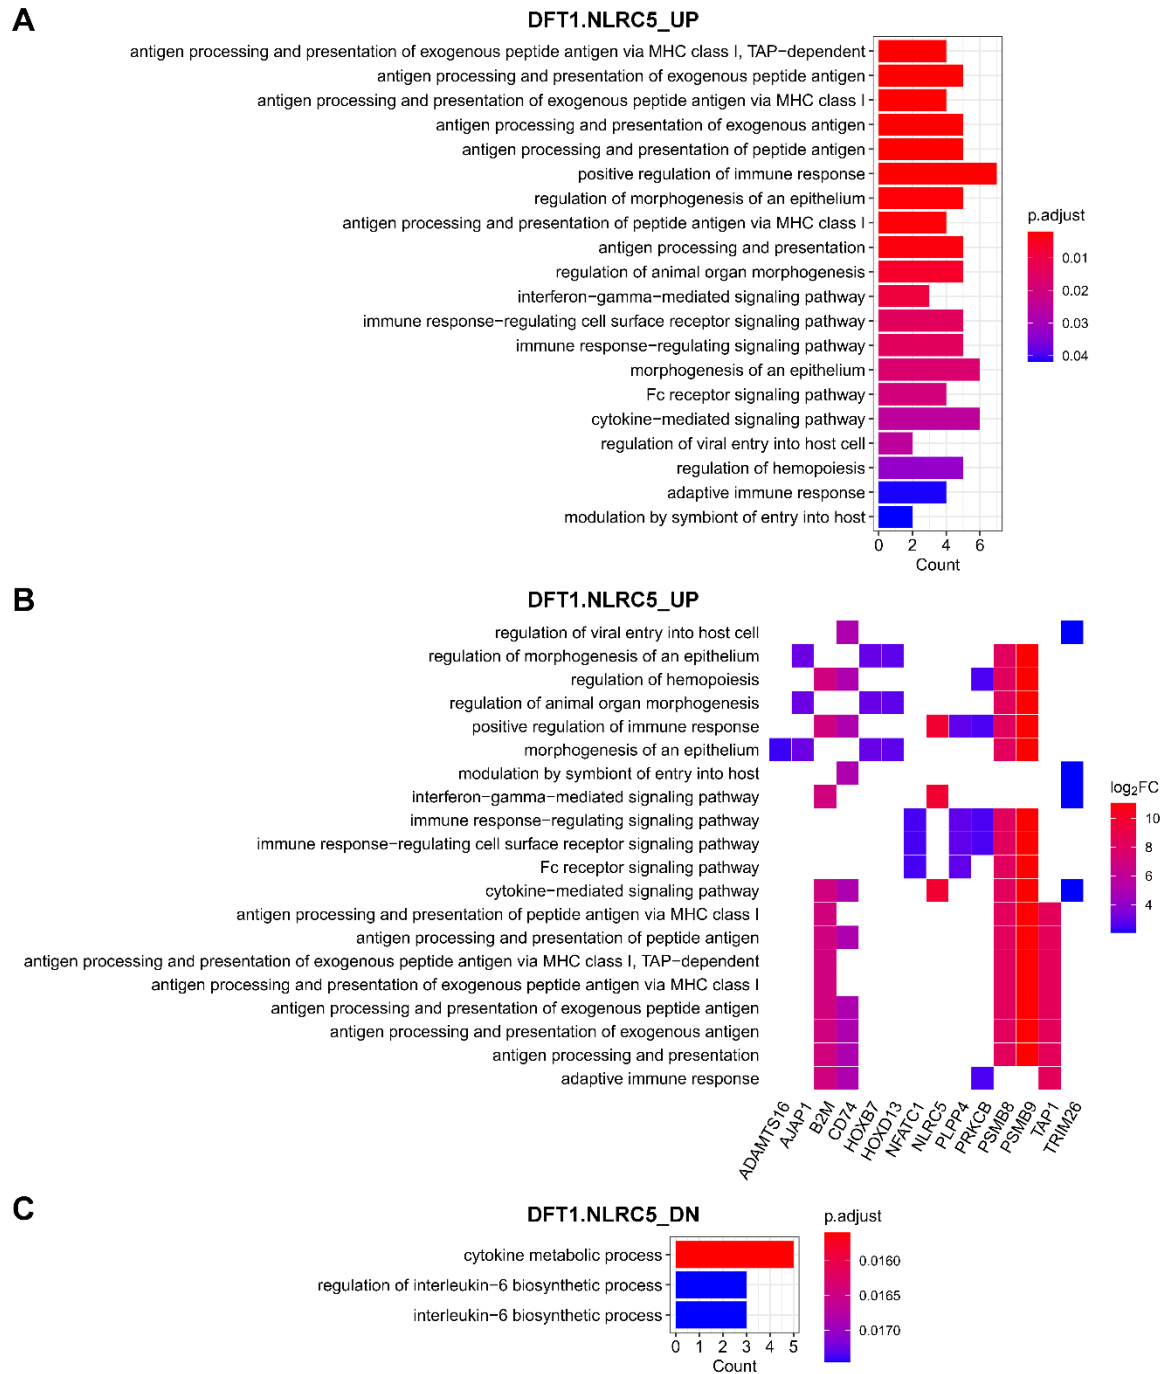

893

894 **Figure 4. GO biological processes that were enriched in DFT1 cells with NLRC5**  
895 **overexpression.** GO biological process terms associated with genes upregulated (UP) (A, B)  
896 and downregulated (DN) (C) in DFT1.NLRC5. (B) Heatplot of genes associated with each  
897 positively-regulated GO term. The cut-offs p-value < 0.001 and adjusted p-value (p.adjust) <  
898 0.05 were used to determine significant biological processes. P values were adjusted for  
899 multiple testing using Benjamini-Hochberg method. See also Supplementary Table 7 for full  
900 list of GO biological processes.

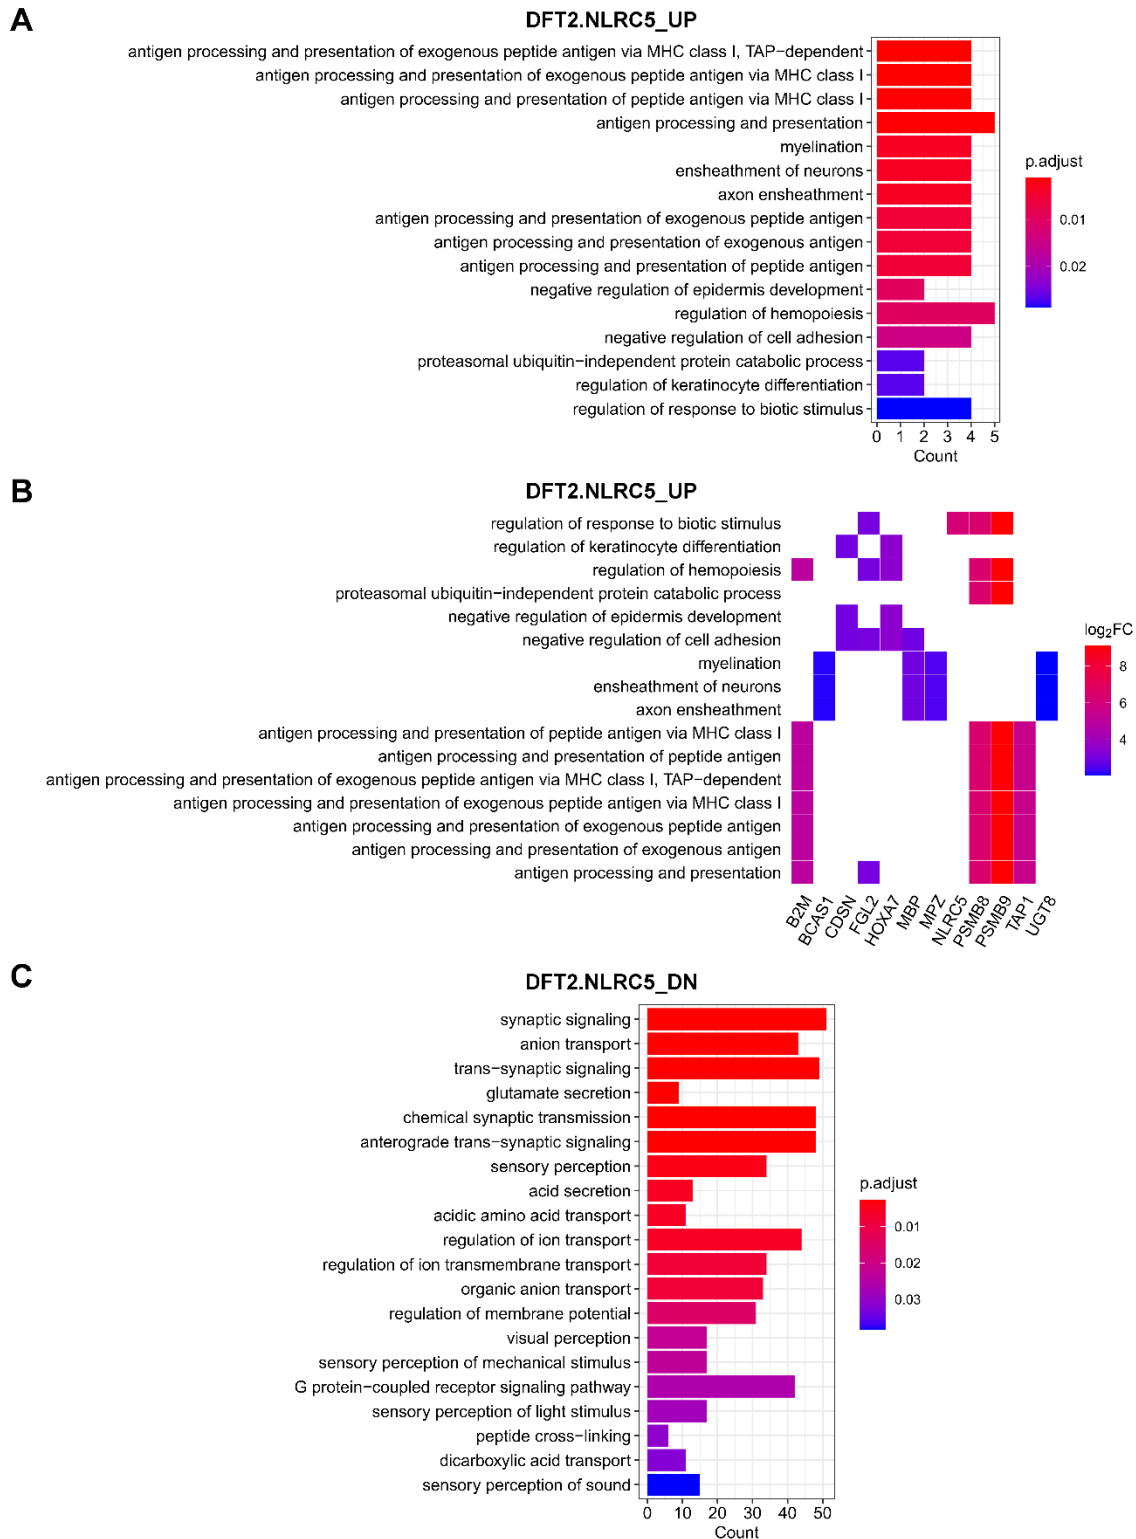

901

902 **Figure 5. GO biological processes that were enriched in DFT2 cells with NLRC5**  
 903 **overexpression.** GO biological process terms associated with genes upregulated (UP) (A, B)  
 904 and downregulated (DN) (C) in DFT2.NLRC5. (B) Heatplot of genes associated with each  
 905 positively-regulated GO term. The cut-offs p-value < 0.001 and adjusted p-value (p.adjust) <  
 906 0.05 were used to determine significant biological processes. P values were adjusted for  
 907 multiple testing using Benjamini–Hochberg method. See also Supplementary Table 8 for full  
 908 list of GO biological processes.

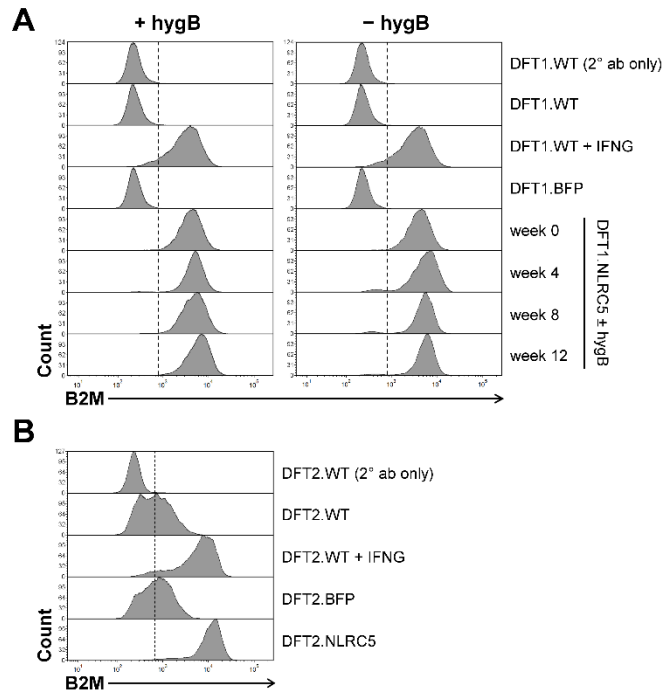

909

910 **Figure 6. Upregulation of MHC-I following NLRC5 overexpression.** Surface expression of  
911 B2M in DFT1.NLRC5 (A) and DFT2.NLRC5 (B). B2M expression in the NLRC5 cell lines  
912 were compared to wild-type (DFT.WT), BFP-control (DFT.BFP), and IFNG-treated (DFT.WT  
913 + IFNG) DFT cells. (A) Stable expression of B2M in DFT1.NLRC5 was assessed every four  
914 weeks for 12 weeks post-drug selection in the presence and absence of hygromycin B (hygB)  
915 selection pressure. Secondary antibody-only staining (DFT.WT (2° ab only)) was included as  
916 a control. The results shown are representative of  $N = 3$  replicates/treatment.

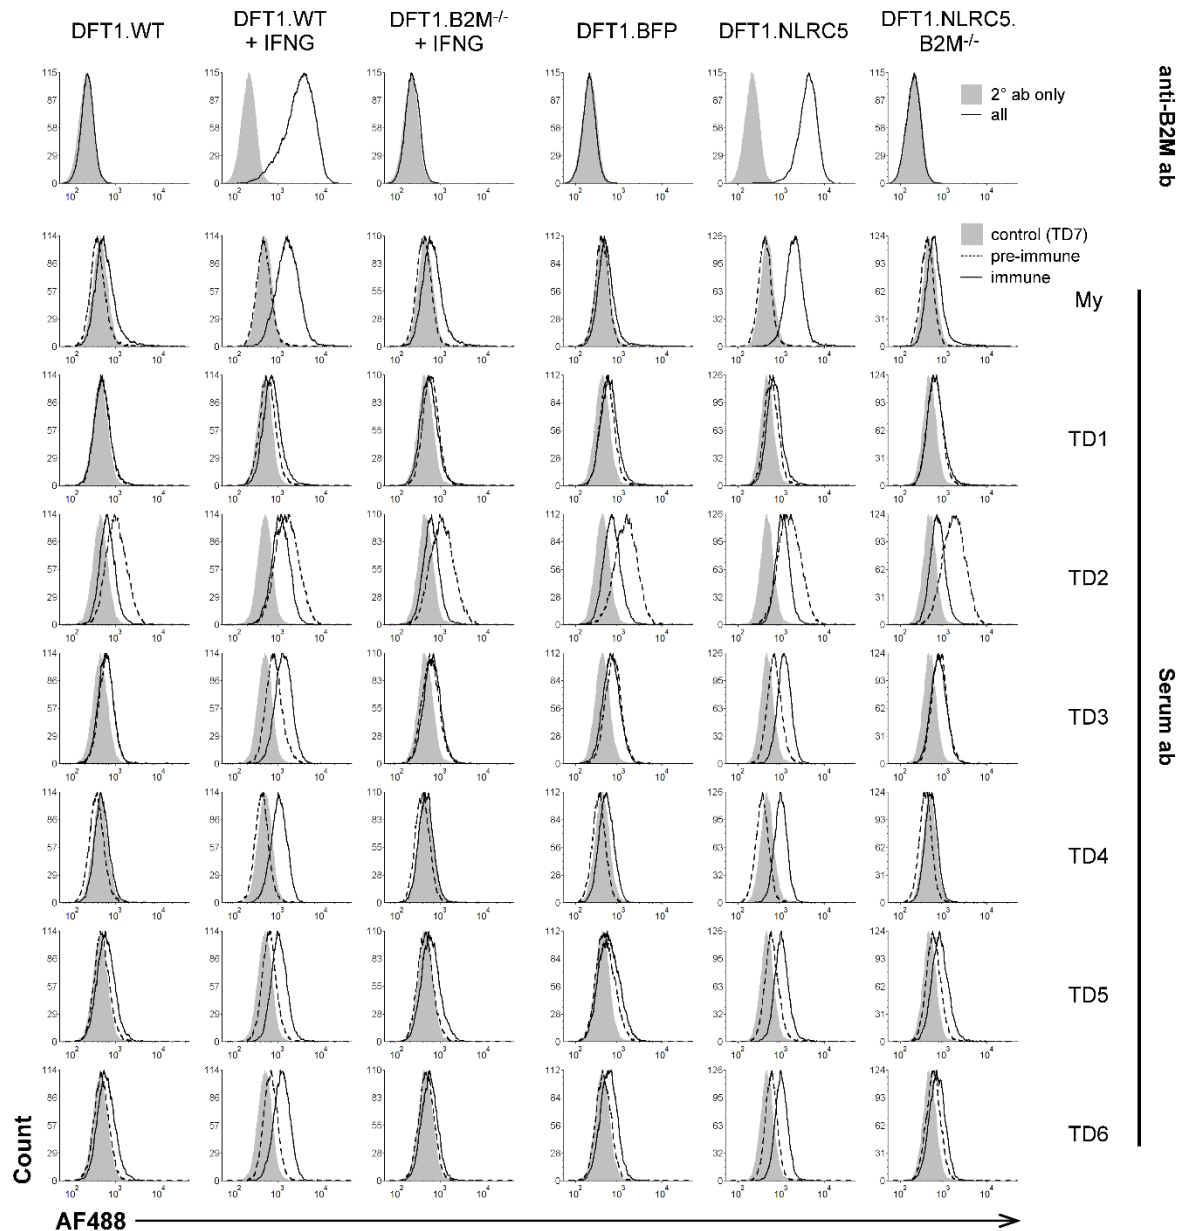

917

918 **Figure 7. Flow cytometric analysis of serum antibody binding from devils with anti-DFT1**  
 919 **antibody response.** Ablation of surface B2M in CRISPR/Cas9-mediated *B2M* knockout cells  
 920 (*B2M*<sup>-/-</sup>) was confirmed using a monoclonal anti-B2M antibody (anti-B2M ab). Sera from six  
 921 devils (TD1-TD6) with seroconversion (immune) following DFTD infection were tested  
 922 against wild-type DFT1 (DFT1.WT), IFNG-treated DFT1 (DFT1.WT + IFNG), IFNG-treated  
 923 *B2M* knockout DFT1 (DFT1.*B2M*<sup>-/-</sup> + IFNG), BFP-control (DFT1.BFP), DFT1 overexpressing  
 924 NLRC5 (DFT1.NLRC5) and *B2M* knockout NLRC5-overexpressing DFT1  
 925 (DFT1.NLRC5.*B2M*<sup>-/-</sup>) cells. An immunized devil with induced tumor regression (My) was  
 926 included as a positive control, meanwhile serum from a healthy devil (TD7) was included as a  
 927 negative control as represented in the shaded grey area. *Ab*, antibody; *AF488*, Alexa Fluor 488.
